# Supplementary material for: Identification and Expression Analysis of the NPF Genes in Cotton
Source: MDPI journal article supplement (doi:10.3390/ijms232214262), 2022-11-17
Supplement: s1 [file s1]

**Table S7. Primer sequences used in qRT-PCR.**

| Gene             | Forward primer (5'-3')  | Reverse primer (5'-3') |
|------------------|-------------------------|------------------------|
| <i>GhNPF1.5</i>  | CAATTTCACCCCTATATTG     | TCTGTGTCATTAGGTCGCAG   |
| <i>GhNPF2.12</i> | GATTCTTGGACAAAGCAGCT    | ACAATACATGATTTGTGATGC  |
| <i>GhNPF3.4</i>  | GTATCAATACTTGTGGCTGTC   | ACACACTGACCTGTACCAAAC  |
| <i>GhNPF4.8</i>  | CAGATAGTGAATCGTGCAACAAA | GACCTGTACTTATAACGCGAAG |
| <i>GhNPF4.17</i> | CACTCACCTTCAACGTATAG    | AGAGCCAGAAGACACTGATAG  |
| <i>GhNPF4.27</i> | TTGCGGGTTTGATAGGGATAA   | GACGCAGGGTCTTATACCTG   |
| <i>GhNPF5.7</i>  | CAGCTTGTCTCACAGCGTT     | TCTTTGAAGCAAGGTGATGC   |
| <i>GhNPF5.35</i> | ACTACATCCAGGAAAACCT     | TCTTCATCCCCTTTGACACT   |
| <i>GhNPF6.5</i>  | GTCCAGTTACAAGGGTAGAG    | GAAATGTCCTATGGTTCTGT   |
| <i>GhNPF6.12</i> | AACAGTTCCGTTTCTTGGAT    | TACAGTGGTTGCCCATATGG   |
| <i>GhNPF6.14</i> | CTGTGCTTGTGCAATCGTGA    | AATGCCTCTTCTTCCACGCAA  |
| <i>GhNPF6.18</i> | AACTGTCGTATGGAGGGTTC    | GTGTAGGGAACCTTTCGGTTA  |
| <i>GhNPF7.8</i>  | TAGTTGGTGCTTTCCTCAGTG   | AAGTATGATGATAGCGACAG   |
| <i>GhNPF8.3</i>  | TCAATGAGGAGTTTGTGGTC    | GGTTGTCCGGTATCCAGCCA   |
| <i>GhNPF8.5</i>  | AGGTAATGAGGGTTGTGAAAG   | TGTAATGTAACATGTTCCACT  |
| <i>GhNPF8.13</i> | GTTCCCATCTATGATAGGAT    | CTGATCTCCACTACAGCTGC   |
