# Supplementary material for: Identification and Expression Analysis of the NPF Genes in Cotton
Source: MDPI journal article supplement (doi:10.3390/ijms232214262), 2022-11-17
Supplement: s1 [file s1]

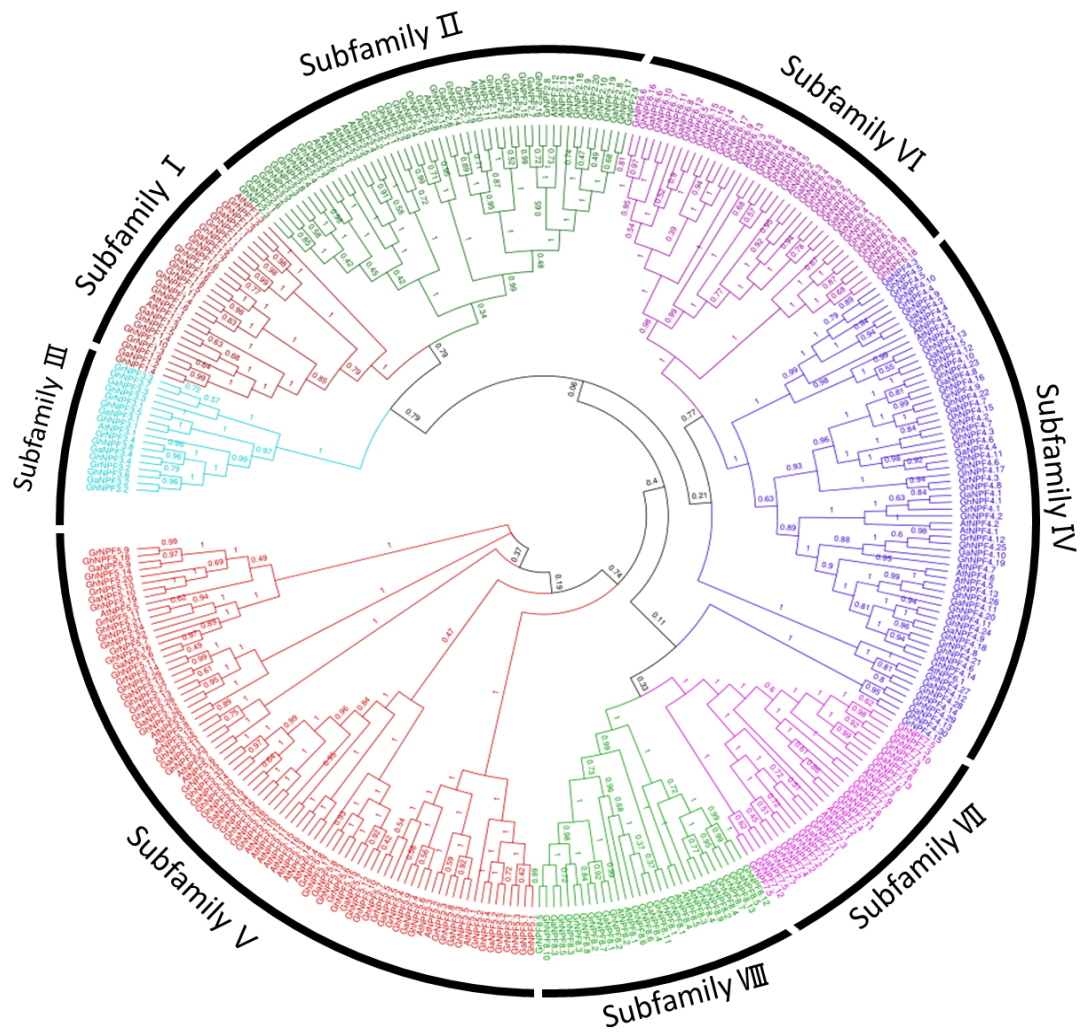

**Figure S1.** Phylogenetic tree and subgroup classification of NPF proteins in *A. thaliana*, *Gossypium hirsutum*, *G. raimondii* and *G. arboreum*. The numbers at nodes of the phylogenetic tree indicate the bootstrap values expressing branching probability per 1000 replicates; the bootstrap values of the confidence levels are shown as percentages.

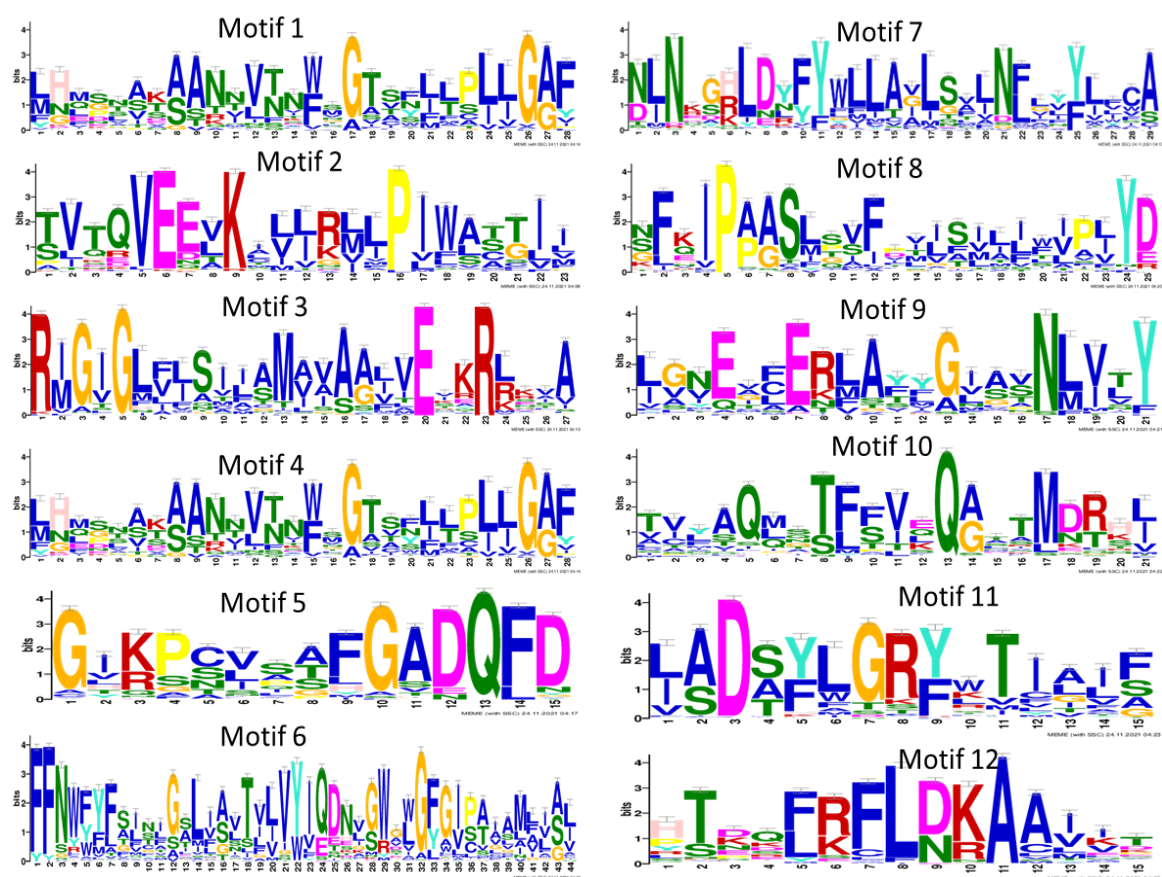

**Figure S2.** Sequence logo of the *GhNPFs* conserved-domain.

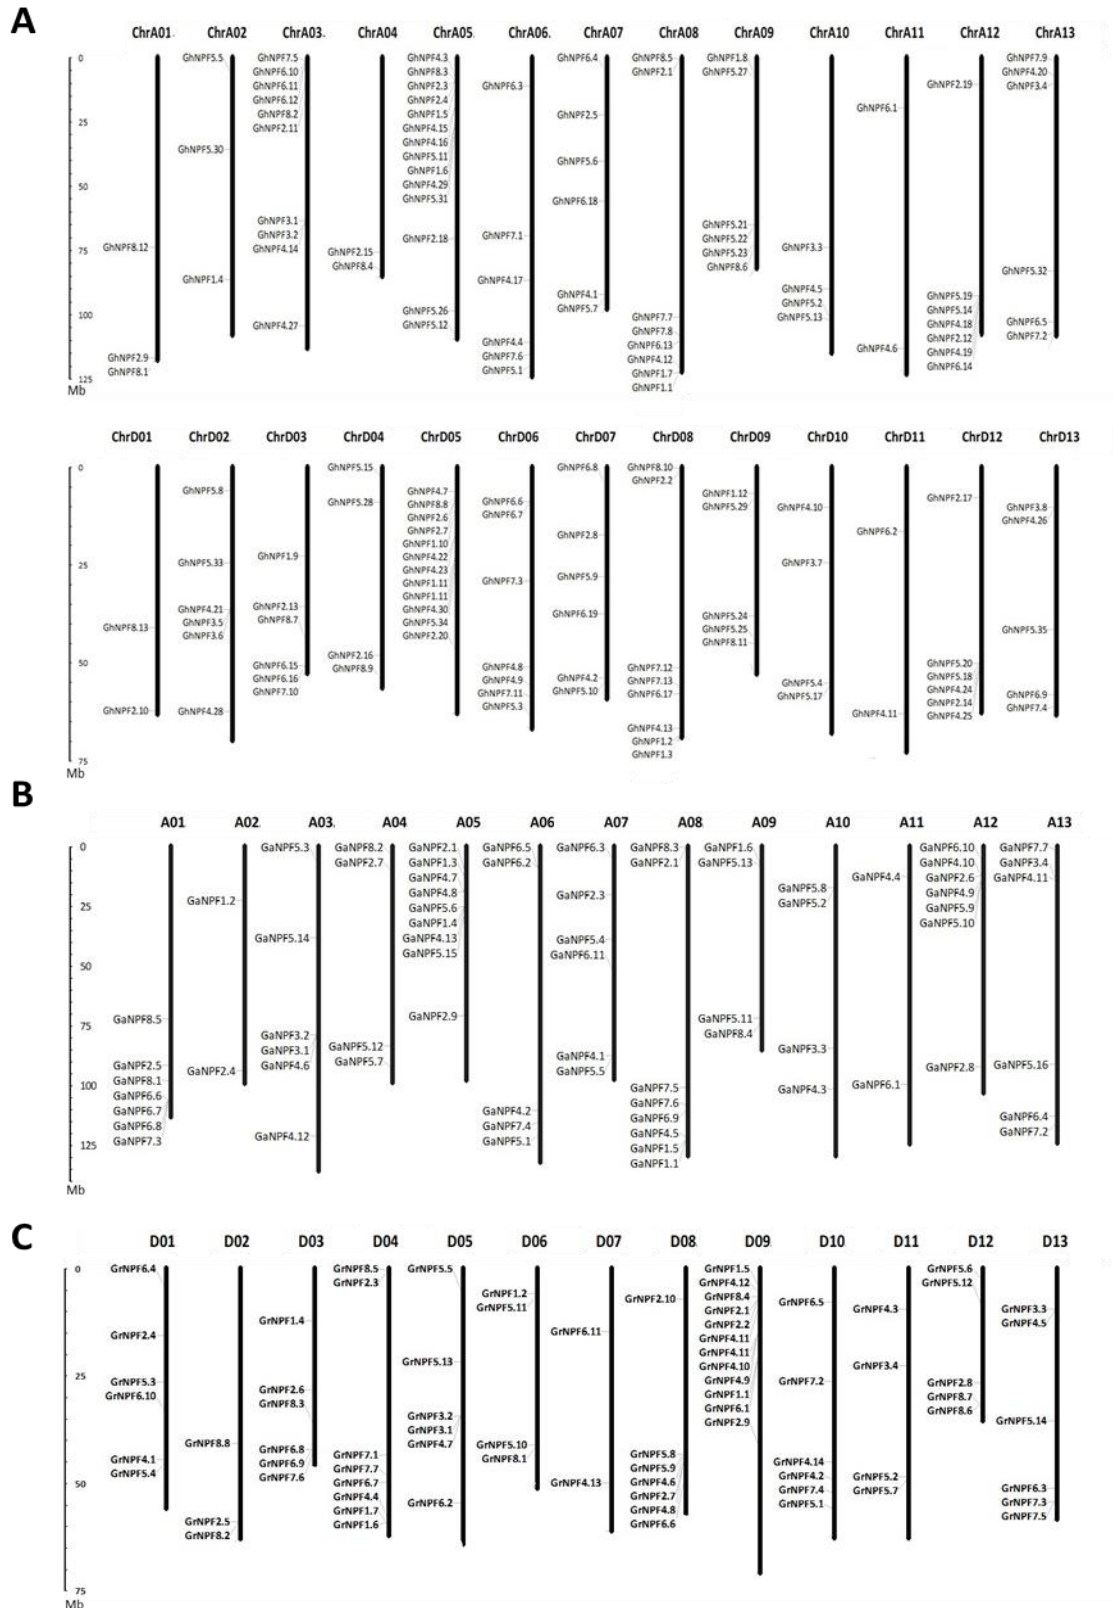

**Figure S3.** Chromosome distribution of *NPF* genes in *G. hirsutum* (A), *G. raimondii* (B) and *G. arboreum* (C). Scale on left is in Mb. Chromosome numbers are indicated on top of bar.

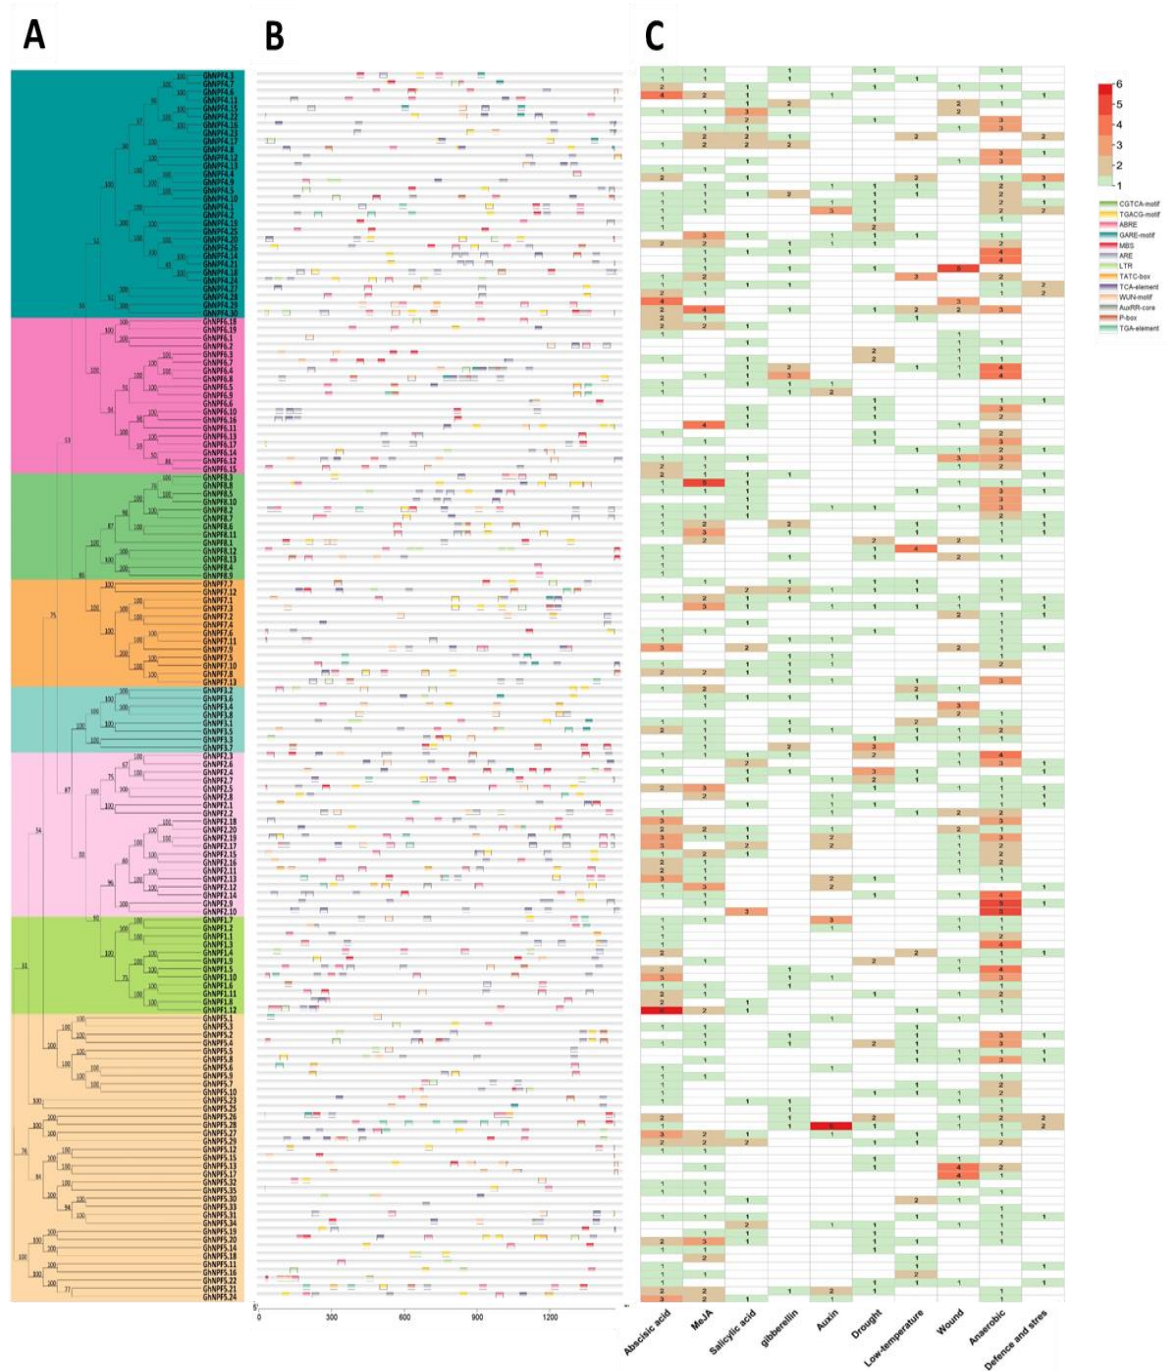

**Figure S4.** Analysis of cis-elements in *GhNPF* promoters. (A) Phylogenetic tree of *GhNPF*s. (B) Cis-elements in promoters of *GhNPF* gene family members. (C) Frequency of cis-elements in the promoter region of *GhNPF* genes. The number in colored box represents the number of cis-acting elements.



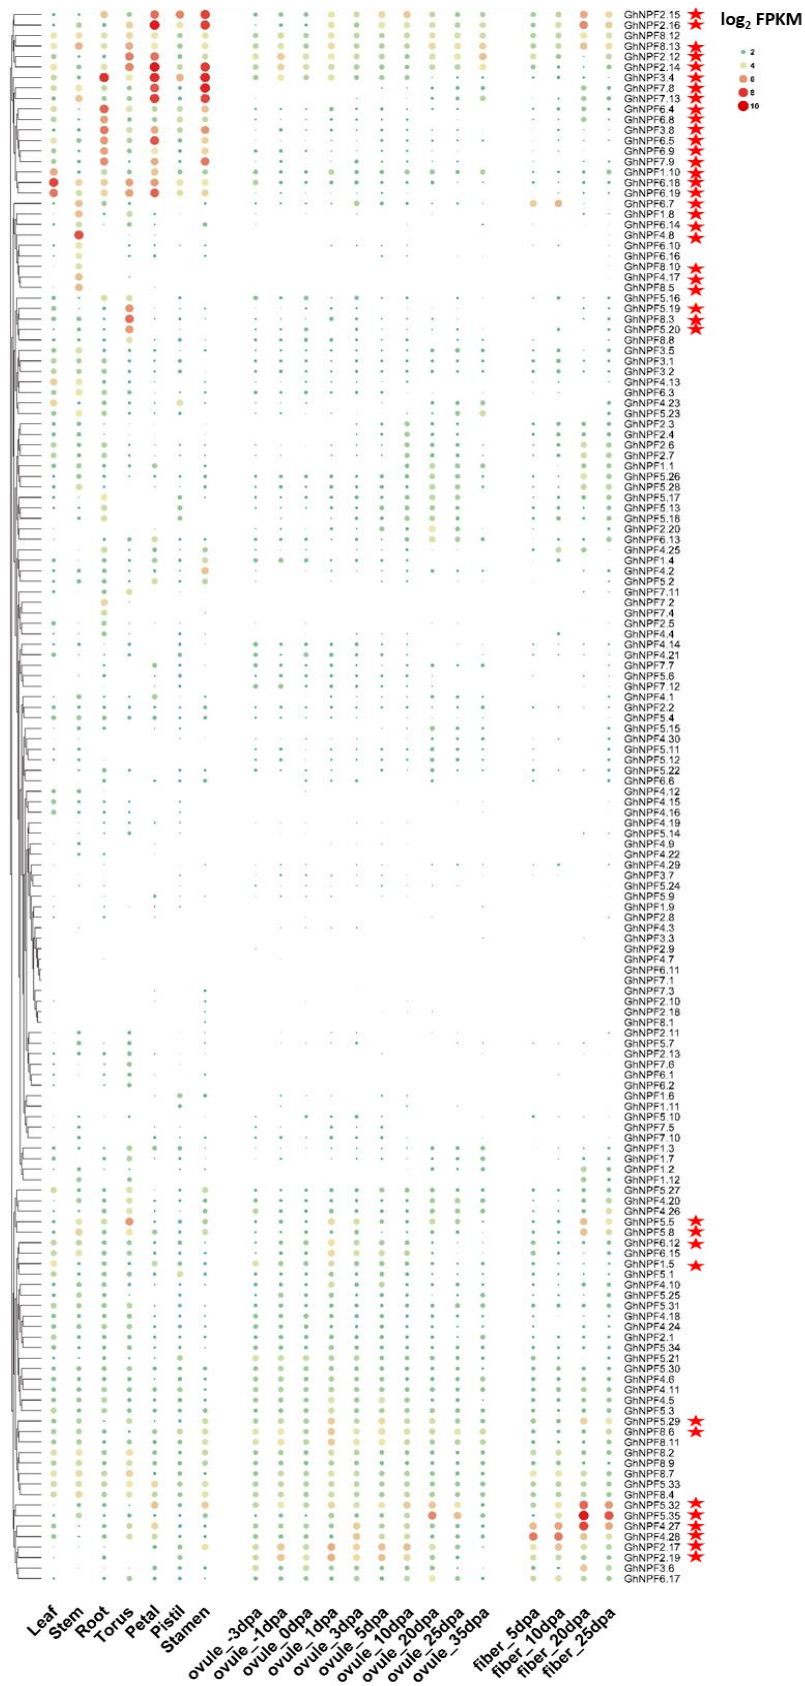

**Figure S5.** Expression patterns of *GhNPF* family genes in different tissues. The expression data were obtained from RNA-seq data and shown as  $\log_2$  FPKM. Asterisks marked *GhNPF* genes selected for N deficiency treatment candidate genes.

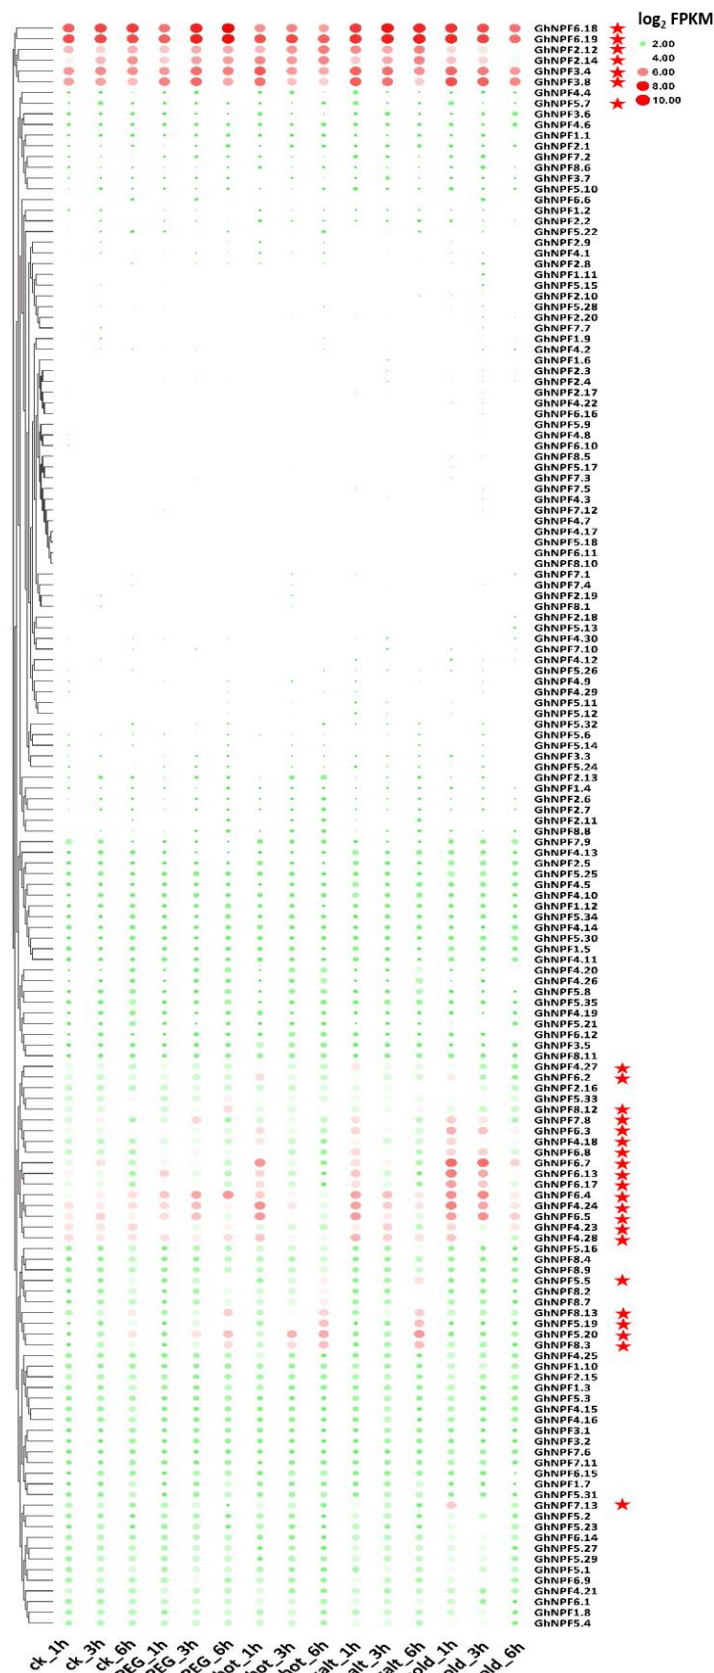

**Figure S6.** Differentially expression level of *GhNPF* gene family members under cold, hot, salt and PEG stress. The expression data were obtained from RNA-seq data and shown as  $\log_2$  FPKM. Asterisks marked *GhNPF* genes selected for N deficiency treatment candidate genes.
