# Supplementary material for: Identification and Expression Analysis of the NPF Genes in Cotton
Source: Int J Mol Sci. 2022 Nov 17;23(22):14262. doi: 10.3390/ijms232214262 (PMC9692789; doi:10.3390/ijms232214262)
Supplement: Supplementary file 1 [file ijms-23-14262-s001.zip]

Archive with 8 entries (8 files):
- Supplement Fig S1-S6.pdf
- Supplement Table S1.xlsx
- Supplement Table S2.xlsx
- Supplement Table S3.xlsx
- Supplement Table S4.xlsx
- Supplement Table S5.xlsx
- Supplement Table S6.xlsx
- Supplement Table S7.pdf
