# Supplementary material for: Identification and Expression Analysis of the NPF Genes in Cotton
Source: Int J Mol Sci. 2022 Nov 17;23(22):14262. doi: 10.3390/ijms232214262 (PMC9692789; doi:10.3390/ijms232214262)
Supplement: Supplementary file 1 [file ijms-23-14262-s001.zip › Supplement Table S1.xlsx]

## Sheet: G hirsutum
Table S1. Characteristics of NPF genes in G hirsutum.
Gene Name	Gene ID	Chromosome	Start	End	Strand	Length (bp)	Transcript Length (bp)	CDS Length (bp)	Protein Length (aa)	Molecular Weight (kDa)	Isoelectric Point
GhNPF1.1	Ghir_A08G026350	A08	122318292	122321054	Plus	2763	1787	1734	577	62.969	6.005
GhNPF1.2	Ghir_D08G027180	D08	68566474	68571221	Plus	4748	1930	1728	575	63.287	8.294
GhNPF1.3	Ghir_D08G027190	D08	68585181	68587966	Plus	2786	1734	1734	577	62.937	6.003
GhNPF1.4	Ghir_A02G013370	A02	86385885	86392826	Plus	6942	2504	1776	591	65.154	9.62
GhNPF1.5	Ghir_A05G013420	A05	12361908	12366481	Minus	4574	2541	1743	580	63.898	9.288
GhNPF1.6	Ghir_A05G025170	A05	25743648	25745928	Plus	2281	2017	1806	601	65.951	8.357
GhNPF1.7	Ghir_A08G026340	A08	122299107	122303985	Plus	4879	2054	1752	583	64.161	7.86
GhNPF1.8	Ghir_A09G002220	A09	6294092	6297574	Plus	3483	2279	1812	603	66.07	8.575
GhNPF1.9	Ghir_D03G007520	D03	22650956	22656228	Minus	5273	2170	1776	591	65.181	9.745
GhNPF1.10	Ghir_D05G013190	D05	11224030	11228606	Minus	4577	2529	1698	565	62.029	9.558
GhNPF1.11	Ghir_D05G025340	D05	23717211	23719311	Minus	2101	1839	1806	601	65.972	8.197
GhNPF1.12	Ghir_D09G002130	D09	6740811	6745531	Plus	4721	1764	1764	587	65.114	8.137
GhNPF2.1	Ghir_A08G001240	A08	973489	979597	Plus	6109	1695	1695	564	62.203	8.718
GhNPF2.2	Ghir_D08G001250	D08	1001152	1007344	Plus	6193	1719	1347	448	50.293	9.219
GhNPF2.3	Ghir_A05G010300	A05	9290268	9292832	Plus	2565	1960	1734	577	63.216	7.426
GhNPF2.4	Ghir_A05G010310	A05	9296651	9300423	Plus	3773	2845	1674	557	61.327	9.126
GhNPF2.5	Ghir_A07G012310	A07	22170673	22174664	Plus	3992	1866	1677	558	61.214	8.522
GhNPF2.6	Ghir_D05G010020	D05	8386361	8388972	Plus	2612	1993	1734	577	63.206	7.176
GhNPF2.7	Ghir_D05G010030	D05	8414119	8417063	Plus	2945	2002	1653	550	60.446	9.377
GhNPF2.8	Ghir_D07G012460	D07	17238583	17247170	Plus	8588	1677	1677	558	61.254	8.73
GhNPF2.9	Ghir_A01G021420	A01	116655265	116656830	Minus	1566	1296	1296	431	47.692	9.244
GhNPF2.10	Ghir_D01G022950	D01	62244149	62246036	Minus	1888	1710	1710	569	63.078	9.362
GhNPF2.11	Ghir_A03G007560	A03	17142603	17145182	Minus	2580	2341	1773	590	65.415	9.199
GhNPF2.12	Ghir_A12G018490	A12	95328514	95330763	Minus	2250	1833	1833	610	68.101	9.446
GhNPF2.13	Ghir_D03G010070	D03	35488510	35490494	Minus	1985	1665	1665	554	61.485	9.143
GhNPF2.14	Ghir_D12G018790	D12	52134229	52137696	Minus	3468	3048	1809	602	66.821	8.928
GhNPF2.15	Ghir_A04G010560	A04	75492592	75495585	Minus	2994	1743	1743	580	64.195	9.051
GhNPF2.16	Ghir_D04G014790	D04	48055696	48059636	Minus	3941	2682	1809	602	66.685	9.531
GhNPF2.17	Ghir_D12G005150	D12	7847690	7851075	Minus	3386	2209	1719	572	63.803	7.555
GhNPF2.18	Ghir_A05G033530	A05	70517475	70519400	Plus	1926	1683	1683	560	62.234	8.388
GhNPF2.19	Ghir_A12G005200	A12	10300470	10302938	Minus	2469	1596	1596	531	58.452	6.76
GhNPF2.20	Ghir_D05G033330	D05	46232613	46234858	Minus	2246	2087	1767	588	65.256	7.796
GhNPF3.1	Ghir_A03G011360	A03	63507211	63510150	Plus	2940	2420	1782	593	65.762	7.647
GhNPF3.2	Ghir_A03G011400	A03	63900772	63904273	Minus	3502	2017	1734	577	64.003	8.952
GhNPF3.3	Ghir_A10G013540	A10	73736028	73739638	Plus	3611	1857	1857	618	69.094	9.134
GhNPF3.4	Ghir_A13G005380	A13	10101767	10105375	Minus	3609	2438	1761	586	64.862	8.417
GhNPF3.5	Ghir_D02G011850	D02	36436632	36439451	Plus	2820	2324	1782	593	65.818	8.411
GhNPF3.6	Ghir_D02G011870	D02	36609428	36617366	Plus	7939	1401	1401	466	51.855	9.386
GhNPF3.7	Ghir_D10G014050	D10	24389808	24393797	Minus	3990	1958	1803	600	66.906	6.702
GhNPF3.8	Ghir_D13G007010	D13	10169431	10175788	Plus	6358	5167	1761	586	64.861	8.417
GhNPF4.1	Ghir_A07G021310	A07	92093757	92097290	Minus	3534	1937	1560	519	57.776	8.37
GhNPF4.2	Ghir_D07G021480	D07	53846195	53849075	Minus	2881	1614	1389	462	51.376	8.372
GhNPF4.3	Ghir_A05G007500	A05	6850492	6852663	Minus	2172	1701	1701	566	63.258	7.328
GhNPF4.4	Ghir_A06G015610	A06	110659061	110662838	Plus	3778	2078	1740	579	64.275	9.411
GhNPF4.5	Ghir_A10G016170	A10	90019795	90022955	Minus	3161	2184	1794	597	66.188	8.523
GhNPF4.6	Ghir_A11G029930	A11	112962739	112966556	Minus	3818	1905	1905	634	70.726	6.516
GhNPF4.7	Ghir_D05G007570	D05	6156689	6158883	Minus	2195	1791	1791	596	66.62	7.673
GhNPF4.8	Ghir_D06G015250	D06	51087432	51089949	Plus	2518	2081	1716	571	63.367	8.027
GhNPF4.9	Ghir_D06G016370	D06	55438758	55442223	Plus	3466	1680	1680	559	62.162	9.123
GhNPF4.10	Ghir_D10G008840	D10	10226703	10229830	Minus	3128	2146	1293	430	48.068	8.125
GhNPF4.11	Ghir_D11G030070	D11	62945402	62950394	Minus	4993	2025	2025	674	75.369	7.086
GhNPF4.12	Ghir_A08G024100	A08	120417913	120420889	Plus	2977	1671	1671	556	61.448	7.416
GhNPF4.13	Ghir_D08G025010	D08	66655005	66658269	Plus	3265	2023	1776	591	65.458	7.639
GhNPF4.14	Ghir_A03G011410	A03	64206111	64209907	Plus	3797	2068	1716	571	62.769	9.391
GhNPF4.15	Ghir_A05G020400	A05	19657707	19665114	Minus	7408	1929	1722	573	63.684	8.35
GhNPF4.16	Ghir_A05G020410	A05	19667628	19670823	Minus	3196	1731	1731	576	64.57	9.697
GhNPF4.17	Ghir_A06G013460	A06	86442181	86444209	Plus	2029	1641	1641	546	60.594	7.415
GhNPF4.18	Ghir_A12G017790	A12	93750202	93755526	Minus	5325	1743	1743	580	63.862	9.629
GhNPF4.19	Ghir_A12G018540	A12	95387367	95389957	Plus	2591	2490	1302	433	48.023	9.08
GhNPF4.20	Ghir_A13G005080	A13	7079449	7083556	Plus	4108	1581	1581	526	58.649	8.822
GhNPF4.21	Ghir_D02G011830	D02	36329246	36333321	Minus	4076	2180	1713	570	62.629	9.372
GhNPF4.22	Ghir_D05G020360	D05	17724713	17732209	Minus	7497	1861	1722	573	63.377	8.592
GhNPF4.23	Ghir_D05G020370	D05	17737829	17741137	Minus	3309	2507	1722	573	63.421	8.371
GhNPF4.24	Ghir_D12G018040	D12	50964527	50968877	Minus	4351	2378	1749	582	64.264	9.294
GhNPF4.25	Ghir_D12G018820	D12	52190575	52194619	Plus	4045	2584	1740	579	64.009	9.085
GhNPF4.26	Ghir_D13G007110	D13	10847883	10851739	Minus	3857	2303	1743	580	63.787	8.375
GhNPF4.27	Ghir_A03G017020	A03	104182103	104185751	Minus	3649	3097	1905	634	70.503	8.816
GhNPF4.28	Ghir_D02G018280	D02	62380750	62382926	Minus	2177	1917	1917	638	71.055	8.578
GhNPF4.29	Ghir_A05G026150	A05	27263856	27267595	Minus	3740	1650	1587	528	58.262	9.738
GhNPF4.30	Ghir_D05G026170	D05	24776014	24778344	Minus	2331	1984	1854	617	68.367	8.44
GhNPF5.1	Ghir_A06G019250	A06	120170012	120174140	Plus	4129	2055	1752	583	65.184	9.174
GhNPF5.2	Ghir_A10G018590	A10	101050631	101056870	Minus	6240	4404	1752	583	65.174	8.969
GhNPF5.3	Ghir_D06G020380	D06	63076793	63080518	Plus	3726	1713	1713	570	63.705	9.274
GhNPF5.4	Ghir_D10G020110	D10	55093705	55097410	Minus	3706	1977	1752	583	64.98	8.968
GhNPF5.5	Ghir_A02G004240	A02	5318171	5323712	Plus	5542	2125	1785	594	66.292	9.468
GhNPF5.6	Ghir_A07G016100	A07	40264636	40267473	Minus	2838	2042	1881	626	69.456	8.962
GhNPF5.7	Ghir_A07G022140	A07	93248898	93252965	Plus	4068	1838	1830	609	68.038	9.359
GhNPF5.8	Ghir_D02G004590	D02	5901858	5907359	Plus	5502	2227	1785	594	66.315	9.468
GhNPF5.9	Ghir_D07G016410	D07	27990929	27993526	Minus	2598	1846	1815	604	66.975	8.404
GhNPF5.10	Ghir_D07G022230	D07	54907598	54911816	Plus	4219	1842	1842	613	68.422	9.274
GhNPF5.11	Ghir_A05G024920	A05	25459948	25461950	Minus	2003	1742	1560	519	57.829	9.346
GhNPF5.12	Ghir_A05G041290	A05	107255425	107259418	Plus	3994	2005	1737	578	63.745	9.29
GhNPF5.13	Ghir_A10G019000	A10	102171050	102175253	Minus	4204	1893	1755	584	64.023	9.995
GhNPF5.14	Ghir_A12G017060	A12	92570694	92572915	Plus	2222	1767	1767	588	66.726	8.837
GhNPF5.15	Ghir_D04G001680	D04	2063925	2069369	Minus	5445	2097	1833	610	67.38	8.963
GhNPF5.16	Ghir_D05G024960	D05	23257265	23259737	Minus	2473	2195	1695	564	63.083	9.076
GhNPF5.17	Ghir_D10G020570	D10	56010953	56016080	Minus	5128	2205	1755	584	64.206	9.948
GhNPF5.18	Ghir_D12G017300	D12	50016457	50023700	Plus	7244	1785	1785	594	67.337	8.746
GhNPF5.19	Ghir_A12G017050	A12	92547840	92550643	Plus	2804	2201	1803	600	68.983	8.793
GhNPF5.20	Ghir_D12G017290	D12	50005735	50008515	Plus	2781	2203	1176	391	44.676	8.09
GhNPF5.21	Ghir_A09G011550	A09	64790402	64793263	Plus	2862	1449	1449	482	55.005	7.495
GhNPF5.22	Ghir_A09G011560	A09	64817114	64818247	Plus	1134	1026	1026	341	38.643	4.755
GhNPF5.23	Ghir_A09G016150	A09	72344791	72348068	Plus	3278	1749	1749	582	64.794	8.584
GhNPF5.24	Ghir_D09G011090	D09	38056964	38058133	Plus	1170	1170	1170	389	44.3	4.717
GhNPF5.25	Ghir_D09G015600	D09	44036227	44040095	Plus	3869	2378	1785	594	66.025	8.578
GhNPF5.26	Ghir_A05G037450	A05	98524685	98529672	Minus	4988	3937	1626	541	60.385	9.053
GhNPF5.27	Ghir_A09G002600	A09	7604271	7607887	Plus	3617	2216	1629	542	60.385	7.758
GhNPF5.28	Ghir_D04G005570	D04	8937497	8942432	Plus	4936	3913	1626	541	60.181	8.896
GhNPF5.29	Ghir_D09G002550	D09	7802525	7806213	Plus	3689	2139	1629	542	60.415	8.096
GhNPF5.30	Ghir_A02G009900	A02	35605745	35609717	Minus	3973	1638	1638	545	59.532	5.289
GhNPF5.31	Ghir_A05G027860	A05	30402340	30404730	Minus	2391	2128	1716	571	62.338	8.234
GhNPF5.32	Ghir_A13G012570	A13	82787702	82790529	Plus	2828	2259	1689	562	61.462	7.964
GhNPF5.33	Ghir_D02G010420	D02	24350898	24355328	Minus	4431	2188	1800	599	65.57	5.322
GhNPF5.34	Ghir_D05G027900	D05	26947333	26949304	Minus	1972	1698	1698	565	62.658	8.669
GhNPF5.35	Ghir_D13G013140	D13	41608287	41610952	Plus	2666	2098	1689	562	61.261	8.232
GhNPF6.1	Ghir_A11G016270	A11	19466217	19469192	Plus	2976	2542	1788	595	65.92	9.234
GhNPF6.2	Ghir_D11G016340	D11	16411932	16414765	Plus	2834	2381	1635	544	60.694	9.6
GhNPF6.3	Ghir_A06G005900	A06	10873102	10877189	Minus	4088	2144	1761	586	63.858	9.305
GhNPF6.4	Ghir_A07G004050	A07	4525433	4529326	Plus	3894	2409	1746	581	63.453	9.19
GhNPF6.5	Ghir_A13G019570	A13	102748696	102752065	Minus	3370	2809	1740	579	64.061	8.916
GhNPF6.6	Ghir_D06G005950	D06	8813269	8818433	Minus	5165	1677	1677	558	61.907	9.556
GhNPF6.7	Ghir_D06G005980	D06	8876154	8879710	Minus	3557	1653	1653	550	59.937	9.692
GhNPF6.8	Ghir_D07G004100	D07	4191370	4194486	Plus	3117	1737	1737	578	63.855	9.172
GhNPF6.9	Ghir_D13G020310	D13	58022266	58025633	Minus	3368	2803	1446	481	53.172	8.503
GhNPF6.10	Ghir_A03G001460	A03	2233212	2236675	Plus	3464	1945	1725	574	63.609	9.204
GhNPF6.11	Ghir_A03G001470	A03	2249704	2253984	Plus	4281	1811	1659	552	61.138	8.858
GhNPF6.12	Ghir_A03G001480	A03	2269813	2274052	Plus	4240	2097	1758	585	64.541	9.199
GhNPF6.13	Ghir_A08G017860	A08	110484617	110487962	Minus	3346	2174	1758	585	64.512	9.432
GhNPF6.14	Ghir_A12G023240	A12	102179676	102182855	Minus	3180	1901	1545	514	56.309	9.642
GhNPF6.15	Ghir_D03G017590	D03	50679660	50683988	Minus	4329	2136	1206	401	44.365	8.549
GhNPF6.16	Ghir_D03G017600	D03	50749719	50753343	Minus	3625	2081	1758	585	64.86	9.104
GhNPF6.17	Ghir_D08G018760	D08	57957873	57961275	Minus	3403	2227	1761	586	64.496	9.52
GhNPF6.18	Ghir_A07G017680	A07	55930408	55933907	Plus	3500	2446	1788	595	65.748	9.133
GhNPF6.19	Ghir_D07G018430	D07	37410804	37414477	Plus	3674	2628	1788	595	65.825	9.13
GhNPF7.1	Ghir_A06G012350	A06	69283914	69285931	Plus	2018	1662	1662	553	61.329	8.41
GhNPF7.2	Ghir_A13G022680	A13	106493230	106495993	Minus	2764	2248	1560	519	56.657	8.188
GhNPF7.3	Ghir_D06G012150	D06	29087411	29089939	Minus	2529	1986	1545	514	56.961	7.294
GhNPF7.4	Ghir_D13G023340	D13	61273673	61276411	Minus	2739	2239	1797	598	65.365	6.076
GhNPF7.5	Ghir_A03G000790	A03	1223334	1227212	Plus	3879	1954	1803	600	66.617	7.317
GhNPF7.6	Ghir_A06G016960	A06	115093268	115099428	Plus	6161	2095	1758	585	64.824	7.855
GhNPF7.7	Ghir_A08G014360	A08	100756929	100759418	Plus	2490	1560	1560	519	57.502	6.314
GhNPF7.8	Ghir_A08G016730	A08	108064696	108071193	Plus	6498	1851	1851	616	68.761	7.25
GhNPF7.9	Ghir_A13G001050	A13	1258479	1262038	Plus	3560	2539	1851	616	68.492	6.694
GhNPF7.10	Ghir_D03G018390	D03	52064670	52068531	Minus	3862	1999	1803	600	66.548	6.688
GhNPF7.11	Ghir_D06G017930	D06	58655985	58661752	Plus	5768	2443	1281	426	47.253	8.609
GhNPF7.12	Ghir_D08G015240	D08	51193443	51196143	Plus	2701	1886	1437	478	52.683	6.244
GhNPF7.13	Ghir_D08G017550	D08	56162482	56167062	Plus	4581	1800	1800	599	66.501	6.817
GhNPF8.1	Ghir_A01G021940	A01	117121496	117122838	Minus	1343	786	786	261	29.274	5.799
GhNPF8.2	Ghir_A03G005790	A03	10299151	10302602	Minus	3452	2437	1713	570	64.13	8.595
GhNPF8.3	Ghir_A05G009240	A05	8488519	8490871	Plus	2353	2010	1620	539	60.846	8.75
GhNPF8.4	Ghir_A04G013880	A04	82714176	82721657	Minus	7482	3740	1755	584	64.522	5.791
GhNPF8.5	Ghir_A08G000650	A08	467334	471783	Minus	4450	1988	1731	576	64.192	7.858
GhNPF8.6	Ghir_A09G017230	A09	73268777	73272296	Minus	3520	2189	1710	569	63.838	8.486
GhNPF8.7	Ghir_D03G013080	D03	43400771	43404202	Plus	3432	2293	1587	528	59.4	8.605
GhNPF8.8	Ghir_D05G009250	D05	7558334	7561886	Plus	3553	1623	1623	540	60.545	8.6
GhNPF8.9	Ghir_D04G018340	D04	53797916	53804996	Minus	7081	3476	1755	584	64.523	5.544
GhNPF8.10	Ghir_D08G000650	D08	442664	447144	Minus	4481	2004	1731	576	64.255	8.304
GhNPF8.11	Ghir_D09G016670	D09	44998144	45002377	Minus	4234	2905	1710	569	63.797	8.354
GhNPF8.12	Ghir_A01G013690	A01	73801899	73817976	Plus	16078	4166	1755	584	64.679	6.262
GhNPF8.13	Ghir_D01G014960	D01	41043709	41049423	Plus	5715	3871	1755	584	64.611	5.791

## Sheet: G raimondii
Table S1. Characteristics of NPF genes in G raimondii.
Gene Name	Gene ID	Chromosome	Start	End	Strand	Length (bp)	Transcript Length (bp)	CDS Length (bp)	Protein Length (aa)	Molecular Weight (kDa)	Isoelectric Point
GrNPF1.1	Gorai.009G262700	Chr09	21702150	21704272	Minus	2123	1859	1806	601	65.971	8.361
GrNPF1.2	Gorai.006G023500	Chr06	6138324	6141523	Plus	3200	2013	1797	598	65.543	8.298
GrNPF1.3	Gorai.009G135700	Chr09	10195456	10199997	Minus	4542	2485	1740	579	63.81	9.384
GrNPF1.4	Gorai.003G064500	Chr03	12672747	12678161	Plus	5415	2293	1776	591	65.125	9.549
GrNPF1.5	Gorai.009G050500	Chr09	3659062	3660033	Plus	971	906	906	301	33.413	7.057
GrNPF1.6	Gorai.004G290200	Chr04	61944911	61947952	Plus	3042	1986	1734	577	62.997	5.812
GrNPF1.7	Gorai.004G290100	Chr04	61927887	61932823	Plus	4937	2168	1752	583	64.334	7.912
GrNPF2.1	Gorai.009G104700	Chr09	7593844	7596220	Plus	2377	1591	1560	519	56.747	7.37
GrNPF2.2	Gorai.009G104800	Chr09	7608344	7611401	Plus	3058	2115	1653	550	60.446	9.377
GrNPF2.3	Gorai.004G012400	Chr04	886339	892331	Plus	5993	1922	1668	555	61.27	8.64
GrNPF2.4	Gorai.001G129100	Chr01	16341176	16345061	Plus	3886	1844	1677	558	61.082	8.917
GrNPF2.5	Gorai.002G256000	Chr02	61818600	61820462	Minus	1863	1710	1710	569	63.136	9.449
GrNPF2.6	Gorai.003G094400	Chr03	29584199	29586483	Minus	2285	2050	1773	590	65.59	8.901
GrNPF2.7	Gorai.008G190200	Chr08	47309032	47311708	Minus	2677	2258	1806	601	66.705	9.032
GrNPF2.8	Gorai.012G121800	Chr12	27763055	27766595	Minus	3541	2300	1809	602	66.695	9.449
GrNPF2.9	Gorai.009G346900	Chr09	42396650	42398583	Minus	1934	1767	1767	588	65.317	7.978
GrNPF2.10	Gorai.008G052800	Chr08	7466082	7469628	Minus	3547	1931	1737	578	63.892	7.221
GrNPF3.1	Gorai.005G138800	Chr05	36068279	36071145	Minus	2867	2372	1782	593	65.854	8.411
GrNPF3.2	Gorai.005G138600	Chr05	35900408	35904451	Minus	4044	1620	1620	539	59.506	9.475
GrNPF3.3	Gorai.013G077000	Chr13	9786611	9789886	Plus	3276	2085	1761	586	64.823	8.415
GrNPF3.4	Gorai.011G146900	Chr11	23736408	23739026	Minus	2619	1713	1713	570	63.247	6.379
GrNPF4.1	Gorai.001G229500	Chr01	46570224	46573502	Minus	3279	1830	1572	523	58.217	8.002
GrNPF4.2	Gorai.010G175400	Chr10	51325236	51329126	Plus	3891	2148	1737	578	64.237	8.967
GrNPF4.3	Gorai.011G091000	Chr11	9802628	9805847	Minus	3220	2097	1788	595	65.841	8.309
GrNPF4.4	Gorai.004G266300	Chr04	60162741	60166135	Plus	3395	1892	1764	587	65.003	7.625
GrNPF4.5	Gorai.013G078600	Chr13	10459684	10463421	Minus	3738	2144	1743	580	63.787	8.375
GrNPF4.6	Gorai.008G183100	Chr08	46108179	46112321	Minus	4143	2161	1749	582	64.187	9.472
GrNPF4.7	Gorai.005G138900	Chr05	36157302	36161065	Plus	3764	1966	1716	571	62.76	9.372
GrNPF4.8	Gorai.008G190500	Chr08	47341888	47346277	Plus	4390	2943	1740	579	63.935	9.095
GrNPF4.9	Gorai.009G208300	Chr09	16154306	16155889	Minus	1583	752	501	166	18.076	8.592
GrNPF4.10	Gorai.009G208200	Chr09	16146741	16149962	Minus	3222	2420	1722	573	63.363	8.182
GrNPF4.11	Gorai.009G208100	Chr09	16133644	16141050	Minus	7407	1758	1722	573	63.363	8.749
GrNPF4.12	Gorai.009G076600	Chr09	5525189	5527229	Minus	2041	1641	1641	546	60.931	8.164
GrNPF4.13	Gorai.007G309500	Chr07	52301888	52304049	Minus	2162	1962	1536	511	57.353	6.52
GrNPF4.14	Gorai.010G163300	Chr10	47200979	47203116	Plus	2138	1716	1716	571	63.339	8.027
GrNPF5.1	Gorai.010G217200	Chr10	58551385	58555487	Plus	4103	2108	1752	583	65.194	9.176
GrNPF5.2	Gorai.011G210900	Chr11	50740475	50744202	Minus	3728	1999	1752	583	64.98	8.968
GrNPF5.3	Gorai.001G180200	Chr01	27641656	27644280	Minus	2625	1539	1539	512	56.291	7.791
GrNPF5.4	Gorai.001G238300	Chr01	47652319	47656515	Plus	4197	1850	1830	609	67.925	9.188
GrNPF5.5	Gorai.005G052500	Chr05	5183875	5189757	Plus	5883	2501	1785	594	66.188	9.379
GrNPF5.6	Gorai.012G017800	Chr12	2034222	2038106	Minus	3885	2091	1737	578	63.936	9.184
GrNPF5.7	Gorai.011G215200	Chr11	51663991	51668262	Minus	4272	2002	1755	584	64.224	10.002
GrNPF5.8	Gorai.008G175900	Chr08	45233781	45238081	Plus	4301	2205	1797	598	68.037	8.579
GrNPF5.9	Gorai.008G176000	Chr08	45245574	45248256	Plus	2683	1913	1836	611	69.404	9.109
GrNPF5.10	Gorai.006G169400	Chr06	42926000	42929864	Plus	3865	2354	1785	594	65.997	8.578
GrNPF5.11	Gorai.006G027600	Chr06	7137679	7141531	Plus	3853	2350	1629	542	60.414	8.096
GrNPF5.12	Gorai.012G058600	Chr12	8222437	8225483	Plus	3047	2025	1626	541	60.151	8.586
GrNPF5.13	Gorai.005G116000	Chr05	22767715	22772005	Minus	4291	2017	1800	599	65.598	5.322
GrNPF5.14	Gorai.013G138200	Chr13	37057923	37060470	Plus	2548	1980	1689	562	61.256	8.232
GrNPF6.1	Gorai.009G271300	Chr09	22689166	22691562	Minus	2396	2051	1854	617	68.495	8.356
GrNPF6.2	Gorai.005G197300	Chr05	57155374	57158505	Minus	3131	2556	1980	659	73.69	8.814
GrNPF6.3	Gorai.013G215400	Chr13	53559495	53562626	Minus	3132	2566	1740	579	64.067	8.814
GrNPF6.4	Gorai.001G041900	Chr01	3856138	3859761	Plus	3624	2137	1746	581	63.548	9.378
GrNPF6.5	Gorai.010G064200	Chr10	8125963	8130085	Minus	4123	2183	1761	586	63.761	9.651
GrNPF6.6	Gorai.008G237500	Chr08	52458634	52463278	Minus	4644	1896	1761	586	64.726	9.079
GrNPF6.7	Gorai.004G199600	Chr04	52095235	52098612	Minus	3378	2214	1761	586	64.535	9.676
GrNPF6.8	Gorai.003G170300	Chr03	44104555	44108964	Minus	4410	2173	1761	586	64.701	9.102
GrNPF6.9	Gorai.003G170400	Chr03	44160870	44164452	Minus	3583	2014	1758	585	64.757	9.201
GrNPF6.10	Gorai.001G196400	Chr01	34330865	34334416	Plus	3552	2507	1788	595	65.826	8.845
GrNPF6.11	Gorai.007G170800	Chr07	15415347	15418069	Plus	2723	2288	1788	595	66.08	8.935
GrNPF7.1	Gorai.004G163000	Chr04	45409582	45412235	Plus	2654	1466	1407	468	51.891	8.452
GrNPF7.2	Gorai.010G127800	Chr10	27443206	27445540	Minus	2335	1975	1728	575	63.653	7.468
GrNPF7.3	Gorai.013G249000	Chr13	56733460	56736141	Minus	2681	2171	1797	598	65.345	6.076
GrNPF7.4	Gorai.010G191000	Chr10	54521222	54526790	Plus	5569	2219	1788	595	65.771	7.858
GrNPF7.5	Gorai.013G249000	Chr13	56733460	56736141	Minus	2682	2171	1797	598	65.345	6.076
GrNPF7.6	Gorai.003G180200	Chr03	45190494	45194281	Minus	3788	1933	1803	600	66.578	6.688
GrNPF7.7	Gorai.004G187700	Chr04	50299153	50304944	Plus	5792	2377	1800	599	66.501	6.817
GrNPF8.1	Gorai.006G180700	Chr06	43811581	43815154	Minus	3574	2234	1710	569	63.724	8.354
GrNPF8.2	Gorai.002G261400	Chr02	62193317	62195039	Minus	1723	1215	1206	401	44.517	8.305
GrNPF8.3	Gorai.003G124700	Chr03	37221158	37224597	Plus	3440	2538	1713	570	64.15	8.596
GrNPF8.4	Gorai.009G093900	Chr09	6858722	6861118	Plus	2397	2012	1791	596	66.928	8.297
GrNPF8.5	Gorai.004G006700	Chr04	391209	395579	Minus	4371	1933	1731	576	64.302	8.174
GrNPF8.6	Gorai.012G159200	Chr12	33205309	33208466	Minus	3157	1722	1722	573	63.206	6.362
GrNPF8.7	Gorai.012G159000	Chr12	33196066	33201911	Minus	5846	2291	1755	584	64.541	5.544
GrNPF8.8	Gorai.002G169800	Chr02	42588513	42592426	Minus	3914	2105	1755	584	64.477	5.788

## Sheet: G arboreum
Table S1. Characteristics of NPF genes in G arboreum.
Gene Name	Gene ID	Chromosome	Start	End	Strand	Length (bp)	Transcript Length (bp)	CDS Length (bp)	Protein Length (aa)	Molecular Weight (kDa)	Isoelectric Point
GaNPF1.1	Ga08G2937	Chr08	129045811	129048501	Plus	2691	1734	1734	577	63.09	5.816
GaNPF1.2	Ga02G0645	Chr02	23364853	23370844	Minus	5992	1776	1776	591	65.149	9.682
GaNPF1.3	Ga05G1381	Chr05	12177635	12181430	Minus	3796	1743	1743	580	63.91	9.384
GaNPF1.4	Ga05G2654	Chr05	26620555	26622624	Minus	2070	1806	1806	601	65.985	8.362
GaNPF1.5	Ga08G2935	Chr08	129030707	129035286	Plus	4580	1752	1752	583	64.333	8.024
GaNPF1.6	Ga09G0251	Chr09	6581899	6584920	Plus	3022	1812	1812	603	66.115	8.441
GaNPF2.1	Ga05G1065	Chr05	9221956	9231819	Plus	9864	3273	3273	1090	119.449	8.969
GaNPF2.2	Ga08G0131	Chr08	995266	1001375	Plus	6110	1650	1650	549	60.49	8.871
GaNPF2.3	Ga07G1267	Chr07	21069772	21073577	Minus	3806	1677	1677	558	61.182	8.521
GaNPF2.4	Ga02G1728	Chr02	98297742	98299622	Minus	1881	1710	1710	569	63.171	9.437
GaNPF2.5	Ga01G1998	Chr01	95732206	95734217	Plus	2012	1773	1773	590	65.448	8.991
GaNPF2.6	Ga12G1094	Chr12	12549025	12551238	Plus	2214	1767	1767	588	65.266	9.402
GaNPF2.7	Ga04G0548	Chr04	9633946	9636965	Plus	3020	1809	1809	602	66.703	9.445
GaNPF2.8	Ga12G2592	Chr12	96642633	96687140	Plus	44508	2334	2334	777	86.021	7.43
GaNPF2.9	Ga05G3606	Chr05	73994930	73996854	Minus	1925	1758	1758	585	64.877	7.947
GaNPF3.1	Ga03G1365	Chr03	82771382	82773671	Minus	2290	1782	1782	593	65.758	7.647
GaNPF3.2	Ga03G1364	Chr03	82589410	82592628	Minus	3219	1734	1734	577	63.848	9.081
GaNPF3.3	Ga10G1600	Chr10	88343586	88346236	Plus	2651	1797	1797	598	66.584	7.337
GaNPF3.4	Ga13G0789	Chr13	13171289	13174218	Plus	2930	1761	1761	586	64.935	8.248
GaNPF4.1	Ga07G2289	Chr07	91634821	91637742	Minus	2922	1572	1572	523	58.181	8.198
GaNPF4.2	Ga06G1765	Chr06	115916691	115920133	Plus	3443	1698	1698	565	62.74	9.527
GaNPF4.3	Ga10G1913	Chr10	106252094	106254873	Minus	2780	1794	1794	597	66.216	8.668
GaNPF4.4	Ga11G0751	Chr11	12916672	12919054	Plus	2383	1827	1827	608	67.918	6.361
GaNPF4.5	Ga08G2704	Chr08	127193897	127196890	Plus	2994	1764	1764	587	65.148	7.977
GaNPF4.6	Ga03G1366	Chr03	83106668	83110211	Plus	3544	1959	1959	652	72.303	9.448
GaNPF4.7	Ga05G2112	Chr05	19501946	19509077	Minus	7132	1722	1722	573	63.502	8.506
GaNPF4.8	Ga05G2113	Chr05	19511616	19516160	Minus	4545	1659	1659	552	61.523	9.106
GaNPF4.9	Ga12G1165	Chr12	14248433	14253756	Plus	5324	1776	1776	591	65.16	9.551
GaNPF4.10	Ga12G1090	Chr12	12479208	12484052	Minus	4845	1830	1830	609	67.822	8.74
GaNPF4.11	Ga13G0822	Chr13	14684562	14688655	Plus	4094	1812	1812	603	66.81	8.319
GaNPF4.12	Ga03G2052	Chr03	126917512	126919690	Minus	2179	1905	1905	634	70.507	8.816
GaNPF4.13	Ga05G2735	Chr05	27783087	27785288	Minus	2202	1854	1854	617	68.328	8.709
GaNPF5.1	Ga06G2178	Chr06	126712879	126716726	Plus	3848	1752	1752	583	65.217	9.275
GaNPF5.2	Ga10G0892	Chr10	19373782	19377366	Plus	3585	1752	1752	583	65.164	9.278
GaNPF5.3	Ga03G0482	Chr03	5844999	5850287	Plus	5289	1785	1785	594	66.32	9.382
GaNPF5.4	Ga07G1699	Chr07	40641826	40644409	Minus	2584	1539	1539	512	56.509	8.346
GaNPF5.5	Ga07G2383	Chr07	92740912	92745006	Plus	4095	1830	1830	609	68.026	9.359
GaNPF5.6	Ga05G2609	Chr05	26061203	26063215	Minus	2013	1257	1257	418	47.237	8.962
GaNPF5.7	Ga04G1965	Chr04	96408389	96412136	Plus	3748	1737	1737	578	63.731	9.181
GaNPF5.8	Ga10G0840	Chr10	17894319	17898355	Plus	4037	1755	1755	584	64.014	9.995
GaNPF5.9	Ga12G1240	Chr12	15431448	15433713	Minus	2266	1779	1779	592	67.174	8.999
GaNPF5.10	Ga12G1241	Chr12	15457502	15460027	Minus	2526	1890	1890	629	72.425	9.351
GaNPF5.11	Ga09G1738	Chr09	75264088	75267378	Plus	3291	1785	1785	594	66.113	8.663
GaNPF5.12	Ga04G1533	Chr04	87316339	87319083	Minus	2745	1689	1689	562	62.778	8.711
GaNPF5.13	Ga09G0305	Chr09	8115680	8118530	Plus	2851	1629	1629	542	60.523	8.134
GaNPF5.14	Ga03G1089	Chr03	39765879	39769920	Minus	4042	1797	1797	598	65.431	5.321
GaNPF5.15	Ga05G2915	Chr05	30852192	30854171	Minus	1980	1716	1716	571	62.35	7.895
GaNPF5.16	Ga13G1503	Chr13	95626992	95629251	Plus	2260	1689	1689	562	61.494	8.018
GaNPF6.1	Ga11G2399	Chr11	104274633	104277610	Minus	2978	1833	1833	610	67.703	9.217
GaNPF6.2	Ga06G0582	Chr06	8984849	8988553	Minus	3705	1761	1761	586	63.916	9.191
GaNPF6.3	Ga07G0429	Chr07	4526696	4529925	Plus	3230	1746	1746	581	63.44	9.19
GaNPF6.4	Ga13G2289	Chr13	118160899	118163204	Minus	2306	1740	1740	579	64.061	8.916
GaNPF6.5	Ga06G0581	Chr06	8930326	8933675	Minus	3350	1071	1071	356	38.855	9.331
GaNPF6.6	Ga01G2682	Chr01	111102801	111106043	Plus	3243	1725	1725	574	63.679	9.079
GaNPF6.7	Ga01G2686	Chr01	111123204	111127335	Plus	4132	1761	1761	586	64.959	8.853
GaNPF6.8	Ga01G2687	Chr01	111159136	111163066	Plus	3931	1758	1758	585	64.561	9.199
GaNPF6.9	Ga08G1999	Chr08	116037527	116040456	Minus	2930	1758	1758	585	64.482	9.524
GaNPF6.10	Ga12G0599	Chr12	5240922	5243770	Plus	2849	1761	1761	586	64.648	8.943
GaNPF6.11	Ga07G1826	Chr07	53218232	53220724	Plus	2493	1635	1635	544	60.42	9.559
GaNPF7.1	Ga14G0373	tig00004306	126200	129322	Plus	3123	1587	1587	528	58.621	7.853
GaNPF7.2	Ga13G2624	Chr13	122168551	122170767	Minus	2217	1797	1797	598	65.326	6.263
GaNPF7.3	Ga01G2716	Chr01	111568988	111572725	Minus	3738	1803	1803	600	66.63	7.104
GaNPF7.4	Ga06G1927	Chr06	120863962	120868649	Plus	4688	1794	1794	597	65.856	8.183
GaNPF7.5	Ga08G1620	Chr08	105576403	105579196	Plus	2794	1464	1464	487	54.035	5.997
GaNPF7.6	Ga08G1871	Chr08	113454652	113459963	Plus	5312	1800	1800	599	66.64	6.657
GaNPF7.7	Ga13G0132	Chr13	1384846	1387724	Plus	2879	1851	1851	616	68.511	6.828
GaNPF8.1	Ga01G2196	Chr01	102899419	102905690	Minus	6272	1725	1725	574	64.7	8.698
GaNPF8.2	Ga04G0224	Chr04	2843395	2846552	Plus	3158	1755	1755	584	64.522	5.791
GaNPF8.3	Ga08G0068	Chr08	420031	425096	Minus	5066	1704	1704	567	63.612	8.184
GaNPF8.4	Ga09G1957	Chr09	77555298	77559124	Minus	3827	1713	1713	570	63.958	8.724
GaNPF8.5	Ga01G1662	Chr01	75576676	75580042	Minus	3367	1755	1755	584	64.707	6.01
