# Supplementary material for: Identification and Expression Analysis of the NPF Genes in Cotton
Source: Int J Mol Sci. 2022 Nov 17;23(22):14262. doi: 10.3390/ijms232214262 (PMC9692789; doi:10.3390/ijms232214262)
Supplement: Supplementary file 1 [file ijms-23-14262-s001.zip › Supplement Table S2.xlsx]

## Sheet: Table S2a
Table S2a. Ka/Ks values of the duplicated gene pairs in three cotton species.
Species	Duplicated gene 1	Duplicated gene 2	Ka	Ks	Ka/Ks	Purifing selection	Duplicate type
G.arboreum_vs_G.arboreum	GaNPF5.9	GaNPF5.10	0.184887	0.266018	0.695015	Yes	segmental			Ka/Ks	0-0.49	0.5-1	>1
	GaNPF5.14	GaNPF5.15	0.106968	0.450095	0.237656	Yes	tandem			G.arboreum_vs_G.arboreum (AA)	22	1	0
	GaNPF5.8	GaNPF5.7	0.0901647	0.720034	0.125223	Yes	tandem			G.raimondii_vs_G.raimondii (DD)	12	0	0
	GaNPF5.12	GaNPF5.13	0.0973514	0.816567	0.11922	Yes	tandem			G.hirsutum_vs_G.hirsutum (AADD)	51	15	3
	GaNPF5.1	GaNPF5.2	0.0544421	0.611812	0.0889851	Yes	tandem			G.arboreum_vs_G.hirsutum (A-At)	37	26	7
	GaNPF5.4	GaNPF5.5	0.111511	0.581539	0.191751	Yes	segmental			G.raimondii_vs_G.hirsutum (D-Dt)	41	18	4
	GaNPF8.5	GaNPF8.2	0.0262135	0.21289	0.123132	Yes	tandem			G.arboreum _vs_G.raimondii (A-D)	60	4	1
	GaNPF8.3	GaNPF8.1	0.13106	1.7796	0.0736454	Yes	tandem			Total	223	64	15	302
	GaNPF7.1	GaNPF7.2	0.133788	1.04744	0.127729	Yes	tandem
	GaNPF7.3	GaNPF7.6	0.0662724	0.946641	0.070008	Yes	tandem
	GaNPF7.4	GaNPF7.7	0.0937486	0.781879	0.119902	Yes	tandem
	GaNPF2.5	GaNPF2.6	0.2858	1.72178	0.165991	Yes	tandem
	GaNPF2.8	GaNPF2.9	0.15025	0.945474	0.158915	Yes	tandem
	GaNPF3.2	GaNPF3.4	0.0872761	0.530654	0.164469	Yes	tandem
	GaNPF6.1	GaNPF6.11	0.095891	0.593474	0.161576	Yes	tandem
	GaNPF1.4	GaNPF1.6	0.118402	0.454274	0.260639	Yes	tandem
	GaNPF1.2	GaNPF1.3	0.0803146	0.583004	0.13776	Yes	tandem
	GaNPF1.1	GaNPF1.5	0.0976825	0.258749	0.377519	Yes	segmental
	GaNPF6.7	GaNPF6.6	0.0359023	0.162872	0.220432	Yes	tandem
	GaNPF6.3	GaNPF6.2	0.0651807	0.516033	0.126311	Yes	tandem
	GaNPF4.3	GaNPF4.2	0.124217	0.591558	0.209984	Yes	tandem
	GaNPF4.7	GaNPF4.8	0.239454	1.16544	0.205462	Yes	segmental
	GaNPF4.6	GaNPF4.9	0.0980088	0.513163	0.19099	Yes	tandem
G. raimondii_vs_G. raimondii	GrNPF6.4	GrNPF6.5	0.0680884	0.499906	0.136202	Yes	tandem
	GrNPF7.5	GrNPF7.2	0.106944	0.96267	0.111091	Yes	tandem
	GrNPF4.2	GrNPF4.3	0.103676	0.548479	0.189025	Yes	tandem
	GrNPF7.7	GrNPF7.6	0.0667921	0.89293	0.074801	Yes	tandem
	GrNPF5.2	GrNPF5.1	0.0529819	0.593889	0.0892117	Yes	tandem
	GrNPF5.12	GrNPF5.11	0.102435	0.764342	0.134017	Yes	tandem
	GrNPF2.9	GrNPF2.10	0.11566	0.973227	0.118842	Yes	tandem
	GrNPF5.14	GrNPF5.13	0.126679	0.433948	0.291923	Yes	tandem
	GrNPF1.4	GrNPF1.3	0.0792549	0.561224	0.141218	Yes	tandem
	GrNPF5.6	GrNPF5.7	0.0882662	0.716714	0.123154	Yes	tandem
	GrNPF8.7	GrNPF8.8	0.0262368	0.196335	0.133632	Yes	tandem
	GrNPF1.2	GrNPF1.1	0.119038	0.447218	0.266176	Yes	tandem
G. hirsutum_vs_G. hirsutum	GhNPF1.3	GhNPF1.1	0.0152415	0.0457672	0.333023	Yes	tandem
	GhNPF1.5	GhNPF1.10	0.00310801	0.0302054	0.102896	Yes	tandem
	GhNPF1.6	GhNPF1.11	0.0079658	0.0345385	0.230635	Yes	tandem
	GhNPF1.7	GhNPF1.2	0.0160895	0.0353229	0.455497	Yes	tandem
	GhNPF1.8	GhNPF1.12	0.0315803	0.0461651	0.684073	Yes	tandem
	GhNPF1.9	GhNPF1.4	0.00820598	0.0361371	0.227079	Yes	tandem
	GhNPF2.13	GhNPF2.11	0.0174438	0.037466	0.46559	Yes	tandem
	GhNPF2.14	GhNPF2.12	0.0102591	0.0718965	0.142692	Yes	tandem
	GhNPF2.15	GhNPF2.16	0.00754249	0.0224176	0.336454	Yes	tandem
	GhNPF2.17	GhNPF2.19	0.055888	0.0865655	0.645614	Yes	tandem
	GhNPF2.2	GhNPF2.1	0.0207917	0.0755769	0.275107	Yes	tandem
	GhNPF2.20	GhNPF2.18	0.0138551	0.0673864	0.205607	Yes	tandem
	GhNPF2.6	GhNPF2.3	0.00840345	0.0345456	0.243257	Yes	tandem
	GhNPF2.7	GhNPF2.4	0.0132035	0.0416955	0.316664	Yes	tandem
	GhNPF2.8	GhNPF2.5	0.0167895	0.0299167	0.561208	Yes	tandem
	GhNPF2.9	GhNPF2.10	0.0168103	0.0498894	0.336951	Yes	tandem
	GhNPF3.5	GhNPF3.1	0.0111464	0.0412809	0.270014	Yes	tandem
	GhNPF3.6	GhNPF3.2	0.0345722	0.0880845	0.392489	Yes	tandem
	GhNPF3.7	GhNPF3.3	0.0154754	0.0683585	0.226386	Yes	tandem
	GhNPF3.8	GhNPF3.4	0.00827232	0.051628	0.160229	Yes	tandem
	GhNPF4.12	GhNPF4.13	0.0070492	0.0537985	0.13103	Yes	tandem
	GhNPF4.2	GhNPF4.1	0.0311783	0.0810046	0.384896	Yes	tandem
	GhNPF4.21	GhNPF4.14	0.00740218	0.0453662	0.163165	Yes	tandem
	GhNPF4.22	GhNPF4.15	0.0185684	0.0529966	0.35037	Yes	tandem
	GhNPF4.23	GhNPF4.16	0.0505336	0.0959177	0.526844	Yes	tandem
	GhNPF4.24	GhNPF4.18	0.0196308	0.0243874	0.804954	Yes	tandem
	GhNPF4.25	GhNPF4.19	0.012242	0.0228714	0.535257	Yes	tandem
	GhNPF4.26	GhNPF4.20	0.0395891	0.0862869	0.458807	Yes	tandem
	GhNPF4.27	GhNPF4.28	0.0126017	0.0423354	0.297663	Yes	tandem
	GhNPF4.29	GhNPF4.30	0.0321483	0.0612585	0.524797	Yes	tandem
	GhNPF4.5	GhNPF4.10	0.026257	0.0252673	1.03917	No	tandem
	GhNPF4.6	GhNPF4.11	0.0124169	0.0420343	0.2954	Yes	tandem
	GhNPF4.7	GhNPF4.3	0.0163662	0.0505302	0.32389	Yes	tandem
	GhNPF4.8	GhNPF4.17	0.0137972	0.0416955	0.330904	Yes	tandem
	GhNPF4.9	GhNPF4.4	0.0181004	0.0182657	0.990949	Yes	tandem
	GhNPF5.12	GhNPF5.15	0.00682512	0.0479155	0.142441	Yes	tandem
	GhNPF5.13	GhNPF5.17	0.0121222	0.0695719	0.174241	Yes	tandem
	GhNPF5.16	GhNPF5.11	0.0287241	0.0480843	0.59737	Yes	tandem
	GhNPF5.18	GhNPF5.14	0.0370398	0.0615994	0.601302	Yes	tandem
	GhNPF5.20	GhNPF5.19	0.0504006	0.0379348	1.32861	No	tandem
	GhNPF5.24	GhNPF5.21	0.0600759	0.0585459	1.02613	No	tandem
	GhNPF5.25	GhNPF5.23	0.00372556	0.0410446	0.0907684	Yes	tandem
	GhNPF5.26	GhNPF5.28	0.0112663	0.0302516	0.37242	Yes	tandem
	GhNPF5.27	GhNPF5.29	0.00963546	0.0556971	0.172997	Yes	tandem
	GhNPF5.3	GhNPF5.1	0.0159178	0.057219	0.27819	Yes	tandem
	GhNPF5.30	GhNPF5.33	0.0206114	0.0353601	0.582899	Yes	tandem
	GhNPF5.31	GhNPF5.34	0.0363432	0.046317	0.784663	Yes	tandem
	GhNPF5.32	GhNPF5.35	0.0127535	0.0390253	0.326802	Yes	tandem
	GhNPF5.4	GhNPF5.2	0.00983001	0.0520225	0.188957	Yes	tandem
	GhNPF5.7	GhNPF5.10	0.00757172	0.0563026	0.134483	Yes	tandem
	GhNPF5.8	GhNPF5.5	0.00553883	0.0602907	0.0918687	Yes	tandem
	GhNPF5.9	GhNPF5.6	0.0116805	0.0355939	0.32816	Yes	tandem
	GhNPF6.16	GhNPF6.10	0.00765655	0.0505348	0.15151	Yes	tandem
	GhNPF6.17	GhNPF6.13	0.00751133	0.0343478	0.218685	Yes	tandem
	GhNPF6.18	GhNPF6.19	0.00589974	0.0362681	0.16267	Yes	tandem
	GhNPF6.2	GhNPF6.1	0.0080847	0.0396481	0.203911	Yes	tandem
	GhNPF6.3	GhNPF6.7	0.0267666	0.0524118	0.510698	Yes	tandem
	GhNPF6.8	GhNPF6.4	0.0377843	0.0795958	0.474702	Yes	tandem
	GhNPF6.9	GhNPF6.5	0.0217199	0.0578766	0.375279	Yes	tandem
	GhNPF7.4	GhNPF7.2	0.0270391	0.0702446	0.384928	Yes	tandem
	GhNPF7.5	GhNPF7.10	0.00653085	0.0600446	0.108767	Yes	tandem
	GhNPF7.6	GhNPF7.11	0.0536116	0.0683287	0.784614	Yes	tandem
	GhNPF7.7	GhNPF7.12	0.0721297	0.0891104	0.809441	Yes	tandem
	GhNPF7.8	GhNPF7.13	0.0218434	0.0694951	0.314315	Yes	tandem
	GhNPF8.4	GhNPF8.12	0.0246624	0.209874	0.11751	Yes	tandem
	GhNPF8.5	GhNPF8.10	0.0106163	0.0464165	0.228718	Yes	tandem
	GhNPF8.6	GhNPF8.11	0.00460536	0.0254154	0.181204	Yes	tandem
	GhNPF8.7	GhNPF8.2	0.00664778	0.041078	0.161833	Yes	tandem
	GhNPF8.8	GhNPF8.3	0.0398095	0.0824926	0.482583	Yes	tandem

## Sheet: Table S2b
Table S2b. Ka/Ks values of the orthologous gene pairs.
Species	Gene 1	Gene 2	Ka	Ks	Ka/Ks	Purifing selection
G.arboreum_vs_G. hirsutum	GaNPF1.1	GhNPF1.1	0.00302039	0.00247934	1.21822	No			Ka/Ks	0-0.49	0.5-1	>1
	GaNPF1.2	GhNPF1.4	0.00223007	0.00945453	0.235873	Yes			G.arboreum_vs_G.arboreum (AA)	22	1	0
	GaNPF1.3	GhNPF1.5	0.00226301	0.0146943	0.154006	Yes			G.raimondii_vs_G.raimondii (DD)	12	0	0
	GaNPF1.4	GhNPF1.6	0.00288948	0.00967755	0.298576	Yes			G.hirsutum_vs_G.hirsutum (AADD)	51	15	3
	GaNPF1.5	GhNPF1.7	0.00524412	0.00489998	1.07023	No			G.arboreum_vs_G.hirsutum (A-At)	37	26	7
	GaNPF1.6	GhNPF1.8	0.000718219	0.00967755	0.0742149	Yes			G.raimondii_vs_G.hirsutum (D-Dt)	41	18	4
	GaNPF2.1	GhNPF2.1	0.00159936	0.0179266	0.0892172	Yes			G.arboreum _vs_G.raimondii (A-D)	60	4	1
	GaNPF2.2	GhNPF2.3	0.0203015	0.0335732	0.604693	Yes			Total	223	64	15	302
	GaNPF2.3	GhNPF2.5	0.00317188	0.00489099	0.648515	Yes
	GaNPF2.4	GhNPF2.9	0.0045447	0.00838466	0.542026	Yes
	GaNPF2.5	GhNPF2.11	0.00367625	0.0074151	0.495779	Yes
	GaNPF2.6	GhNPF2.12	0.0372328	0.0574051	0.648598	Yes
	GaNPF2.7	GhNPF2.15	0.00150169	0.00246205	0.609936	Yes
	GaNPF2.8	GhNPF2.19	0.0488126	0.0868808	0.561834	Yes
	GaNPF2.9	GhNPF2.18	0.0070313	0.0050934	1.38047	No
	GaNPF3.1	GhNPF3.1	0.00147711	0.00236407	0.624815	Yes
	GaNPF3.2	GhNPF3.2	0.00456854	0.00485046	0.941878	Yes
	GaNPF3.3	GhNPF3.3	0.0183041	0.0464602	0.393973	Yes
	GaNPF3.4	GhNPF3.4	0.00299701	0.0168276	0.1781	Yes
	GaNPF4.1	GhNPF4.1	0.00250801	0.00559443	0.448305	Yes
	GaNPF4.2	GhNPF4.4	0.0217063	0.0262524	0.82683	Yes
	GaNPF4.3	GhNPF4.5	0.000727229	0.00241206	0.301497	Yes
	GaNPF4.4	GhNPF4.6	0.00286004	0.00474591	0.602632	Yes
	GaNPF4.5	GhNPF4.12	0.00312175	0.00785347	0.3975	Yes
	GaNPF4.6	GhNPF4.14	0.00543727	0.0143918	0.377803	Yes
	GaNPF4.7	GhNPF4.15	0.00767368	0.0223249	0.343727	Yes
	GaNPF4.8	GhNPF4.16	0.0479324	0.0612998	0.781934	Yes
	GaNPF4.9	GhNPF4.18	0.00076036	0.00949004	0.0801219	Yes
	GaNPF4.10	GhNPF4.19	0.00101095	0.00649706	0.155601	Yes
	GaNPF4.11	GhNPF4.20	0.0256658	0.0445074	0.576664	Yes
	GaNPF4.12	GhNPF4.27	0.0013905	0.00433841	0.320509	Yes
	GaNPF4.13	GhNPF4.29	0.0176377	0.0214905	0.820721	Yes
	GaNPF5.1	GhNPF5.1	0.00150019	0.00484068	0.309913	Yes
	GaNPF5.2	GhNPF5.2	0.00225493	0.00481639	0.468179	Yes
	GaNPF5.3	GhNPF5.5	0.00221171	0.0118979	0.18589	Yes
	GaNPF5.4	GhNPF5.6	0.00535199	0.0142624	0.375252	Yes
	GaNPF5.5	GhNPF5.7	0.00215595	0.00695254	0.310095	Yes
	GaNPF5.6	GhNPF5.11	0.0725828	0.0743404	0.976357	Yes
	GaNPF5.7	GhNPF5.12	0.00151248	0.00981208	0.154145	Yes
	GaNPF5.8	GhNPF5.13	0.00225819	0.0119572	0.188856	Yes
	GaNPF5.9	GhNPF5.14	0.0052967	0.00994833	0.532421	Yes
	GaNPF5.10	GhNPF5.19	0.00617773	0.00841186	0.734407	Yes
	GaNPF5.11	GhNPF5.23	0.00148819	0.00500732	0.297202	Yes
	GaNPF5.12	GhNPF5.26	0.00400562	0.00269724	1.48508	No
	GaNPF5.13	GhNPF5.27	0.00319702	0.00269179	1.18769	No
	GaNPF5.14	GhNPF5.30	0.00407942	0.00494236	0.8254	Yes
	GaNPF5.15	GhNPF5.31	0.003106	0.00474873	0.654069	Yes
	GaNPF5.16	GhNPF5.32	0.00316352	0.00960974	0.329199	Yes
	GaNPF6.1	GhNPF6.1	0.00147095	0.00710906	0.206912	Yes
	GaNPF6.2	GhNPF6.3	0.000752823	0.00702581	0.107151	Yes
	GaNPF6.3	GhNPF6.4	0.000759878	0.00706997	0.10748	Yes
	GaNPF6.4	GhNPF6.5	0.0015186	0.00479235	0.316881	Yes
	GaNPF6.5	GhNPF6.6	0.094528	0.0927238	1.01946	No
	GaNPF6.6	GhNPF6.10	0.00228891	0.0123155	0.185856	Yes
	GaNPF6.7	GhNPF6.11	0.00318556	0.0203921	0.156216	Yes
	GaNPF6.8	GhNPF6.12	0.00149701	0.00963869	0.155312	Yes
	GaNPF6.9	GhNPF6.13	0.000747384	0.00481929	0.155082	Yes
	GaNPF6.10	GhNPF6.14	0.0129163	0.017266	0.748077	Yes
	GaNPF6.11	GhNPF6.18	0.00080429	0.00517243	0.155495	Yes
	GaNPF7.1	GhNPF7.1	0.120144	0.129454	0.928088	Yes
	GaNPF7.2	GhNPF7.2	0.0208552	0.032821	0.635424	Yes
	GaNPF7.3	GhNPF7.5	0.00217116	0.00724206	0.299799	Yes
	GaNPF7.4	GhNPF7.11	0.0224638	0.0282582	0.794949	Yes
	GaNPF7.5	GhNPF7.7	0.0090849	0.00657899	1.3809	No
	GaNPF7.6	GhNPF7.8	0.0189571	0.0280043	0.676934	Yes
	GaNPF7.7	GhNPF7.9	0.00211293	0.00470774	0.448819	Yes
	GaNPF8.1	GhNPF8.2	0.00635312	0.00680557	0.933516	Yes
	GaNPF8.3	GhNPF8.5	0.0180505	0.0299308	0.603073	Yes
	GaNPF8.4	GhNPF8.6	0.0162776	0.0202801	0.802641	Yes
	GaNPF8.5	GhNPF8.12	0.00149719	0.0146049	0.102513	Yes
G. raimondii_vs_G. hirsutum	GrNPF1.1	GhNPF1.11	0.000720029	0.0146525	0.0491404	Yes
	GrNPF1.2	GhNPF1.12	0.0192702	0.031388	0.613935	Yes
	GrNPF1.3	GhNPF1.10	0.000775845	0.00494949	0.156753	Yes
	GrNPF1.4	GhNPF1.9	0.0044643	0.00709225	0.629461	Yes
	GrNPF1.6	GhNPF1.3	0.00151076	0.0124226	0.121614	Yes
	GrNPF1.7	GhNPF1.2	0.0091511	0.0199845	0.457909	Yes
	GrNPF2.1	GhNPF2.6	0.00338625	0.00808452	0.418856	Yes
	GrNPF2.3	GhNPF2.2	0.0110259	0.0194816	0.565966	Yes
	GrNPF2.4	GhNPF2.8	0.00555595	0.00983419	0.564962	Yes
	GrNPF2.5	GhNPF2.10	0.00611819	0.00509232	1.20146	No
	GrNPF2.6	GhNPF2.13	0.0128948	0.0203748	0.632879	Yes
	GrNPF2.7	GhNPF2.14	0.00509989	0.0070797	0.720354	Yes
	GrNPF2.8	GhNPF2.16	0.00217549	0.00472071	0.46084	Yes
	GrNPF2.9	GhNPF2.20	0.00370875	0.0246429	0.1505	Yes
	GrNPF2.10	GhNPF2.17	0.0343945	0.0497223	0.691732	Yes
	GrNPF3.1	GhNPF3.5	0.00221593	0.00474122	0.467375	Yes
	GrNPF3.2	GhNPF3.6	0.0467842	0.0932123	0.50191	Yes
	GrNPF3.3	GhNPF3.8	0.00149794	0.0143717	0.104229	Yes
	GrNPF3.4	GhNPF3.7	0.0069917	0.0374376	0.186756	Yes
	GrNPF4.1	GhNPF4.2	0.0249723	0.0515086	0.484818	Yes
	GrNPF4.2	GhNPF4.9	0.00701258	0.0130127	0.538903	Yes
	GrNPF4.3	GhNPF4.10	0.0231794	0.00816526	2.83879	No
	GrNPF4.4	GhNPF4.13	0.00147583	0.0124639	0.118408	Yes
	GrNPF4.6	GhNPF4.24	0.00302992	0.0143145	0.211667	Yes
	GrNPF4.7	GhNPF4.21	0.0015532	0.00956188	0.162436	Yes
	GrNPF4.8	GhNPF4.25	0.00227618	0.0096542	0.235771	Yes
	GrNPF4.10	GhNPF4.23	0.00152798	0.00245048	0.623543	Yes
	GrNPF4.11	GhNPF4.22	0.00230062	0.00242522	0.94862	Yes
	GrNPF4.12	GhNPF4.7	0.00239362	0.00788098	0.303721	Yes
	GrNPF4.13	GhNPF4.11	0.00255573	0.00562064	0.454705	Yes
	GrNPF4.14	GhNPF4.8	0.000768837	0.00978009	0.0786124	Yes
	GrNPF5.1	GhNPF5.3	0.0120026	0.0261709	0.458623	Yes
	GrNPF5.2	GhNPF5.4	0.00150565	0.00718855	0.209451	Yes
	GrNPF5.3	GhNPF5.9	0.00267738	0.019897	0.134562	Yes
	GrNPF5.4	GhNPF5.10	0.00829784	0.0222455	0.373012	Yes
	GrNPF5.5	GhNPF5.8	0.00294841	0.00713159	0.413429	Yes
	GrNPF5.7	GhNPF5.17	0.00527939	0.02903	0.18186	Yes
	GrNPF5.8	GhNPF5.20	0.0271037	0.0148842	1.82097	No
	GrNPF5.9	GhNPF5.18	0.01176	0.0154059	0.763344	Yes
	GrNPF5.10	GhNPF5.25	0.000730194	0.00977611	0.0746917	Yes
	GrNPF5.11	GhNPF5.29	0.00159808	0.0080827	0.197716	Yes
	GrNPF5.12	GhNPF5.28	0.0032	0.0108796	0.294129	Yes
	GrNPF5.13	GhNPF5.33	0.00147692	0.0114114	0.129425	Yes
	GrNPF5.14	GhNPF5.35	0.0023797	0.00950884	0.250261	Yes
	GrNPF6.1	GhNPF4.30	0.00354046	0.0115721	0.305948	Yes
	GrNPF6.2	GhNPF4.28	0.00347565	0.0153711	0.226116	Yes
	GrNPF6.3	GhNPF6.9	0.0179459	0.0279169	0.642834	Yes
	GrNPF6.4	GhNPF6.8	0.0344934	0.0556044	0.620337	Yes
	GrNPF6.5	GhNPF6.7	0.0184696	0.018487	0.999055	Yes
	GrNPF6.7	GhNPF6.17	0.00224299	0.00961937	0.233175	Yes
	GrNPF6.8	GhNPF6.15	0.0470441	0.0667771	0.704494	Yes
	GrNPF6.9	GhNPF6.16	0.00450029	0.0120654	0.372991	Yes
	GrNPF6.10	GhNPF6.19	0.00220615	0.00474122	0.465313	Yes
	GrNPF6.11	GhNPF6.2	0.00322538	0.0155782	0.207044	Yes
	GrNPF7.1	GhNPF7.12	0.0338698	0.0578677	0.585297	Yes
	GrNPF7.2	GhNPF7.3	0.00935519	0.0112309	0.832986	Yes
	GrNPF7.6	GhNPF7.10	0.00217064	0.0194856	0.111397	Yes
	GrNPF8.2	GhNPF8.11	0.233934	4.38638	0.053332	Yes
	GrNPF8.3	GhNPF8.7	0.000827815	0.00266904	0.310154	Yes
	GrNPF8.4	GhNPF8.8	0.00812906	0.0213443	0.380855	Yes
	GrNPF8.5	GhNPF8.10	0.00301925	0.00250104	1.2072	No
	GrNPF8.7	GhNPF8.9	0.00224146	0.00978208	0.229139	Yes
	GrNPF8.8	GhNPF8.13	0.00300075	0.00966976	0.310324	Yes
G.arboreum_vs_G. raimondii	GrNPF5.9	GaNPF5.9	0.0276891	0.0733679	0.377401	Yes
	GrNPF5.8	GaNPF5.10	0.0349831	0.034187	1.02329	No
	GrNPF2.3	GaNPF2.1	0.0210384	0.0860194	0.244577	Yes
	GrNPF2.4	GaNPF2.3	0.0143832	0.0400262	0.359344	Yes
	GrNPF2.1	GaNPF2.2	0.0296157	0.0630779	0.46951	Yes
	GaNPF1.4	GrNPF1.1	0.00651116	0.0524231	0.124204	Yes
	GaNPF1.6	GrNPF1.2	0.015358	0.037267	0.412106	Yes
	GaNPF1.2	GrNPF1.4	0.00670937	0.0238731	0.281043	Yes
	GaNPF1.3	GrNPF1.3	0.00302401	0.0373599	0.0809427	Yes
	GaNPF1.5	GrNPF1.7	0.0135588	0.0427162	0.317417	Yes
	GrNPF1.6	GaNPF1.1	0.0179272	0.0419512	0.427336	Yes
	GrNPF2.6	GaNPF2.5	0.00958538	0.0174826	0.548282	Yes
	GaNPF2.6	GrNPF2.7	0.0267557	0.108901	0.245688	Yes
	GaNPF2.4	GrNPF2.5	0.0146112	0.0444478	0.328727	Yes
	GaNPF2.7	GrNPF2.8	0.00508353	0.0312796	0.162519	Yes
	GrNPF2.9	GaNPF2.9	0.010244	0.0641967	0.159571	Yes
	GrNPF2.10	GaNPF2.8	0.0428411	0.0887648	0.482637	Yes
	GaNPF3.3	GrNPF3.4	0.00777511	0.0607671	0.127949	Yes
	GaNPF3.1	GrNPF3.1	0.0118984	0.0387574	0.306996	Yes
	GaNPF3.4	GrNPF3.3	0.00676315	0.0490471	0.137891	Yes
	GrNPF3.2	GaNPF3.2	0.045083	0.0866595	0.520232	Yes
	GrNPF7.1	GaNPF7.5	0.0279126	0.0380037	0.734469	Yes
	GrNPF7.5	GaNPF7.2	0.00883825	0.0309875	0.28522	Yes
	GaNPF7.1	GrNPF7.2	0.0243256	0.0527658	0.461012	Yes
	GrNPF7.6	GaNPF7.3	0.00507585	0.0470937	0.107782	Yes
	GaNPF7.6	GrNPF7.7	0.00583058	0.0441755	0.131987	Yes
	GaNPF7.4	GrNPF7.4	0.00958951	0.0241567	0.396971	Yes
	GaNPF8.2	GrNPF8.7	0.00373693	0.03489	0.107106	Yes
	GrNPF8.8	GaNPF8.5	0.0120727	0.0394828	0.305771	Yes
	GaNPF8.4	GrNPF8.1	0.0160309	0.0498322	0.321698	Yes
	GrNPF8.3	GaNPF8.1	0.0133483	0.0502733	0.265515	Yes
	GrNPF8.5	GaNPF8.3	0.0228949	0.0574864	0.398267	Yes
	GrNPF5.1	GaNPF5.1	0.00225113	0.034574	0.0651104	Yes
	GrNPF5.2	GaNPF5.2	0.0105935	0.0443388	0.238922	Yes
	GrNPF5.5	GaNPF5.3	0.00628237	0.0551268	0.113962	Yes
	GrNPF5.3	GaNPF5.4	0.0138322	0.030454	0.454201	Yes
	GrNPF5.4	GaNPF5.5	0.00721159	0.0550047	0.131109	Yes
	GrNPF5.10	GaNPF5.11	0.0043924	0.0347744	0.126311	Yes
	GaNPF5.7	GrNPF5.6	0.00682426	0.035021	0.194862	Yes
	GaNPF5.8	GrNPF5.7	0.012123	0.0592169	0.204722	Yes
	GrNPF5.12	GaNPF5.12	0.00883603	0.0246767	0.358073	Yes
	GrNPF5.11	GaNPF5.13	0.00963675	0.0499145	0.193065	Yes
	GaNPF5.16	GrNPF5.14	0.0103519	0.0339726	0.304711	Yes
	GaNPF5.14	GrNPF5.13	0.0187276	0.0442331	0.423383	Yes
	GaNPF4.12	GrNPF6.2	0.00767181	0.035549	0.215809	Yes
	GaNPF4.13	GrNPF6.1	0.0135275	0.0475878	0.284264	Yes
	GaNPF6.1	GrNPF6.11	0.00961848	0.0337068	0.285357	Yes
	GrNPF6.10	GaNPF6.11	0.00402902	0.0343068	0.117441	Yes
	GaNPF6.9	GrNPF6.7	0.00902606	0.0393372	0.229454	Yes
	GaNPF6.8	GrNPF6.8	0.00600604	0.0469289	0.127982	Yes
	GrNPF6.9	GaNPF6.6	0.00688517	0.0350502	0.196437	Yes
	GaNPF6.4	GrNPF6.3	0.00685632	0.0342358	0.200268	Yes
	GaNPF6.2	GrNPF6.5	0.00832239	0.0358134	0.232382	Yes
	GrNPF6.4	GaNPF6.3	0.00380711	0.0286888	0.132704	Yes
	GrNPF4.4	GaNPF4.5	0.00889448	0.0512363	0.173597	Yes
	GaNPF4.3	GrNPF4.3	0.00512322	0.0171017	0.299573	Yes
	GaNPF4.2	GrNPF4.2	0.0372477	0.0559389	0.665863	Yes
	GrNPF4.13	GaNPF4.4	0.0137255	0.037373	0.367256	Yes
	GrNPF4.11	GaNPF4.7	0.014677	0.0580487	0.252839	Yes
	GaNPF4.8	GrNPF4.10	0.0260283	0.0491872	0.529169	Yes
	GaNPF4.1	GrNPF4.1	0.00665193	0.0515963	0.128923	Yes
	GaNPF4.10	GrNPF4.8	0.012207	0.0294456	0.414562	Yes
	GrNPF4.5	GaNPF4.11	0.013256	0.0477214	0.277778	Yes
	GaNPF4.6	GrNPF4.7	0.00856707	0.0339589	0.252278	Yes
	GrNPF4.6	GaNPF4.9	0.0184471	0.0388201	0.475195	Yes
