# Supplementary material for: Identification and Expression Analysis of the NPF Genes in Cotton
Source: Int J Mol Sci. 2022 Nov 17;23(22):14262. doi: 10.3390/ijms232214262 (PMC9692789; doi:10.3390/ijms232214262)
Supplement: Supplementary file 1 [file ijms-23-14262-s001.zip › Supplement Table S3.xlsx]

## Sheet: Table S3
Table S3. The frequency of cis-regulatory elements in the 1500 bp promoter region of NPF genes in G. hirsutum, scanned in New PLACE database.
Gene name	Gene ID	Abscisic acid	MeJA	Salicylic acid	gibberellin	Auxin	Drought	Low-temperature	Wound	Anaerobic	Defence and stres
GhNPF1.1	Ghir_A08G026350	1								2
GhNPF1.2	Ghir_D08G027180	1				1			1	1
GhNPF1.3	Ghir_D08G027190	1								4
GhNPF1.4	Ghir_A02G013370	2						2		1	1
GhNPF1.5	Ghir_A05G013420	2			1				1	4
GhNPF1.6	Ghir_A05G025170	1	1		1					1
GhNPF1.7	Ghir_A08G026340	1	1			3			1	1
GhNPF1.8	Ghir_A09G002220	2		1						1
GhNPF1.9	Ghir_D03G007520		1				2		1	1
GhNPF1.10	Ghir_D05G013190	3			1	1				3
GhNPF1.11	Ghir_D05G025340	2	1				1		1	2
GhNPF1.12	Ghir_D09G002130	6	2	1				1		1
GhNPF2.1	Ghir_A08G001240			1		1	1			1	1
GhNPF2.2	Ghir_D08G001250	1				1		1	2	2
GhNPF2.3	Ghir_A05G010300	1	1	1	1		2		1	4
GhNPF2.4	Ghir_A05G010310	1		1	1		3	1			1
GhNPF2.5	Ghir_A07G012310	2	3				1		1	1	1
GhNPF2.6	Ghir_D05G010020			2					1	3	1
GhNPF2.7	Ghir_D05G010030			1		1	2	1		1
GhNPF2.8	Ghir_D07G012460		2			1				1	1
GhNPF2.9	Ghir_A01G021420		1							5	1
GhNPF2.10	Ghir_D01G022950			3						5
GhNPF2.11	Ghir_A03G007560	2	1						1	1
GhNPF2.12	Ghir_A12G018490	1	3			2					1
GhNPF2.13	Ghir_D03G010070	3	1			2	1			1
GhNPF2.14	Ghir_D12G018790	1	1				1		1	4
GhNPF2.15	Ghir_A04G010560	1	2	1					1	2
GhNPF2.16	Ghir_D04G014790	2	1						1	2
GhNPF2.17	Ghir_D12G005150	3		2		2			1	2
GhNPF2.18	Ghir_A05G033530	3								3
GhNPF2.19	Ghir_A12G005200	3	1	1		2			1	3
GhNPF2.20	Ghir_D05G033330	2	2	1		1			2	1
GhNPF3.1	Ghir_A03G011360	1	1		1			2		1
GhNPF3.2	Ghir_A03G011400	1	2					2	1
GhNPF3.3	Ghir_A10G013540		1				1	1	1	1
GhNPF3.4	Ghir_A13G005380		1						3
GhNPF3.5	Ghir_D02G011850	2	1		1	1		1	1	2
GhNPF3.6	Ghir_D02G011870		1	1	1			1
GhNPF3.7	Ghir_D10G014050		1		2		3
GhNPF3.8	Ghir_D13G007010								2	1
GhNPF4.1	Ghir_A07G021310	1	1			1	1			2	1
GhNPF4.2	Ghir_D07G021480	1	1			3	1			2	2
GhNPF4.3	Ghir_A05G007500	1	1		1		1			1
GhNPF4.4	Ghir_A06G015610	1	1
GhNPF4.5	Ghir_A10G016170		1			1	1	1		2	1
GhNPF4.6	Ghir_A11G029930	2		1			1		1	1
GhNPF4.7	Ghir_D05G007570	1	1		1			1
GhNPF4.8	Ghir_D06G015250	1	2	2	2
GhNPF4.9	Ghir_D06G016370	2		1				2		1	3
GhNPF4.10	Ghir_D10G008840	1	1	1	2		1	1		2
GhNPF4.11	Ghir_D11G030070	4	2	1		1					1
GhNPF4.12	Ghir_A08G024100									3	1
GhNPF4.13	Ghir_D08G025010			1					1	3
GhNPF4.14	Ghir_A03G011410		1	1	1					4
GhNPF4.15	Ghir_A05G020400			1	2				2	1
GhNPF4.16	Ghir_A05G020410			2			1			3
GhNPF4.17	Ghir_A06G013460		2	2	1			2			2
GhNPF4.18	Ghir_A12G017790		1		1		1		5
GhNPF4.19	Ghir_A12G018540	1					1			1
GhNPF4.20	Ghir_A13G005080		3	1		1	1	1		1
GhNPF4.21	Ghir_D02G011830		1							4
GhNPF4.22	Ghir_D05G020360	1	1	3	1				2
GhNPF4.23	Ghir_D05G020370		1	1					1	3
GhNPF4.24	Ghir_D12G018040	1	2					3		2
GhNPF4.25	Ghir_D12G018820	1					2
GhNPF4.26	Ghir_D13G007110	2	2		1	1	1			2
GhNPF4.27	Ghir_A03G017020	1	1	1	1					1	2
GhNPF4.28	Ghir_D02G018280	2	1							1	2
GhNPF4.29	Ghir_A05G026150	4							3
GhNPF4.30	Ghir_D05G026170	2	4		1		1	2	2	3
GhNPF5.1	Ghir_A06G019250					1			1
GhNPF5.2	Ghir_A10G018590		1		1			1		3	1
GhNPF5.3	Ghir_D06G020380	1	1					1
GhNPF5.4	Ghir_D10G020110	1	1		1		2	1		3
GhNPF5.5	Ghir_A02G004240							1	1	1	1
GhNPF5.6	Ghir_A07G016100	1				1
GhNPF5.7	Ghir_A07G022140	1						1		2
GhNPF5.8	Ghir_D02G004590		1					1	1	3	1
GhNPF5.9	Ghir_D07G016410	1	1							1
GhNPF5.10	Ghir_D07G022230	1					1	1	1	2
GhNPF5.11	Ghir_A05G024920	1						1			1
GhNPF5.12	Ghir_A05G041290	1	1
GhNPF5.13	Ghir_A10G019000		1				1		4	2
GhNPF5.14	Ghir_A12G017060	1	1				1
GhNPF5.15	Ghir_D04G001680						1		1
GhNPF5.16	Ghir_D05G024960	1	1					2
GhNPF5.17	Ghir_D10G020570								4	1
GhNPF5.18	Ghir_D12G017300		2					1
GhNPF5.19	Ghir_A12G017050		1	1			1			1
GhNPF5.20	Ghir_D12G017290	2	3	1			1	1		1
GhNPF5.21	Ghir_A09G011550	2	2		1	2	1			1
GhNPF5.22	Ghir_A09G011560	1					1	1	1		1
GhNPF5.23	Ghir_A09G016150	1		1	1				1	1
GhNPF5.24	Ghir_D09G011090	3	2	1		1				1
GhNPF5.25	Ghir_D09G015600				1					1
GhNPF5.26	Ghir_A05G037450	2			1		2		1	2	2
GhNPF5.27	Ghir_A09G002600	3	2	1		1		1		1
GhNPF5.28	Ghir_D04G005570	1			1	6	1		1	1	2
GhNPF5.29	Ghir_D09G002550	2	2	2			1	1		2
GhNPF5.30	Ghir_A02G009900			1				2	1
GhNPF5.31	Ghir_A05G027860	1	1	1				1		1	1
GhNPF5.32	Ghir_A13G012570	1	1						1
GhNPF5.33	Ghir_D02G010420									1
GhNPF5.34	Ghir_D05G027900			2		1	1		1	1
GhNPF5.35	Ghir_D13G013140	1	1							1
GhNPF6.1	Ghir_A11G016270	1							1
GhNPF6.2	Ghir_D11G016340			1					1	1
GhNPF6.3	Ghir_A06G005900						2		1
GhNPF6.4	Ghir_A07G004050			1	2			1	1	4
GhNPF6.5	Ghir_A13G019570	1		1	1	1
GhNPF6.6	Ghir_D06G005950						1			1	1
GhNPF6.7	Ghir_D06G005980	1		1			2		1	1
GhNPF6.8	Ghir_D07G004100		1	1	3				1	4
GhNPF6.9	Ghir_D13G020310	1			1	2
GhNPF6.10	Ghir_A03G001460			1			1			3
GhNPF6.11	Ghir_A03G001470		4	1					1
GhNPF6.12	Ghir_A03G001480	1	1	1					3	3
GhNPF6.13	Ghir_A08G017860	1					1			2
GhNPF6.14	Ghir_A12G023240							1	1	2	1
GhNPF6.15	Ghir_D03G017590	2	1						1	2
GhNPF6.16	Ghir_D03G017600			1			1			2
GhNPF6.17	Ghir_D08G018760		1				1			3
GhNPF6.18	Ghir_A07G017680	2	1					1
GhNPF6.19	Ghir_D07G018430	2	2	1
GhNPF7.1	Ghir_A06G012350	1	2	1	1				1	1	1
GhNPF7.2	Ghir_A13G022680								2	1	1
GhNPF7.3	Ghir_D06G012150		3	1		1	1	1	1		1
GhNPF7.4	Ghir_D13G023340			1						1
GhNPF7.5	Ghir_A03G000790				1	1				1
GhNPF7.6	Ghir_A06G016960	1	1				1			1
GhNPF7.7	Ghir_A08G014360		1		1		1	1		1
GhNPF7.8	Ghir_A08G016730	2	2	1	1
GhNPF7.9	Ghir_A13G001050	3		2					2	1	1
GhNPF7.10	Ghir_D03G018390	1		1	1	1				2
GhNPF7.11	Ghir_D06G017930	1			1	1				1
GhNPF7.12	Ghir_D08G015240			2	2	1	1	1		1
GhNPF7.13	Ghir_D08G017550				1	1		1		3
GhNPF8.1	Ghir_A01G021940		2				2		2	1
GhNPF8.2	Ghir_A03G005790	1	1	1		1	1		1	3
GhNPF8.3	Ghir_A05G009240	2	1	1	1						1
GhNPF8.4	Ghir_A04G013880	1
GhNPF8.5	Ghir_A08G000650	1	1	1				1		3	1
GhNPF8.6	Ghir_A09G017230	1	2		2			1		1	1
GhNPF8.7	Ghir_D03G013080	1	1	1						2	1
GhNPF8.8	Ghir_D05G009250	1	5	1					1	1
GhNPF8.9	Ghir_D04G018340	1
GhNPF8.10	Ghir_D08G000650			1						3
GhNPF8.11	Ghir_D09G016670	1	3		1			1		1	1
GhNPF8.12	Ghir_A01G013690	1					1	4
GhNPF8.13	Ghir_D01G014960	1			1		1		2	1
