# Supplementary material for: Identification and Expression Analysis of the NPF Genes in Cotton
Source: Int J Mol Sci. 2022 Nov 17;23(22):14262. doi: 10.3390/ijms232214262 (PMC9692789; doi:10.3390/ijms232214262)
Supplement: Supplementary file 1 [file ijms-23-14262-s001.zip › Supplement Table S4.xlsx]

## Sheet: Supplement Table S4
Table S4. Expression patterns of GhNPF family genes in different tissues.
Gene name	Gene ID	Leaf	Stem	Root	Torus	Petal	Pistil	Stamen	ovule_-3dpa	ovule_-1dpa	ovule_0dpa	ovule_1dpa	ovule_3dpa	ovule_5dpa	ovule_10dpa	ovule_20dpa	ovule_25dpa	ovule_35dpa	fiber_5dpa	fiber_10dpa	fiber_20dpa	fiber_25dpa
GhNPF1.1	Ghir_A08G026350	3.12166	5.44665	1.51405	0.967382	5.38882	0.0616095	0.758314	0	0	0	0	0.0313034	0.0400503	3.14529	9.15109	5.01827	4.03742	0	0.0884415	4.54935	4.89773
GhNPF1.2	Ghir_D08G027180	0.270541	2.31713	0.190701	0.342083	0.0485208	0.311992	0.303325	0.0325184	0	0	0	0	0	0.0756168	1.80947	0.570258	2.46686	0	0.0442208	7.88087	3.1786
GhNPF1.3	Ghir_D08G027190	1.44829	0.860847	0.438156	6.33504	3.80099	2.74747	0.153459	0.131614	0.187252	0.116054	0.273595	0.326144	0.256346	0.193862	1.9378	1.84644	2.86271	0.0793997	0.171476	0.28353	0.998745
GhNPF1.4	Ghir_A02G013370	2.00072	0.0989227	3.3332	0.822475	5.742	1.35766	10.6717	2.91438	4.17342	2.77447	0.550412	1.18039	0.74407	0.625329	0.0186549	0	0	0.0772725	1.63975	0	0.0666102
GhNPF1.5	Ghir_A05G013420	19.0104	1.21914	3.58323	1.41	8.98491	3.23875	1.30238	12.8924	5.14494	4.71397	11.7137	4.68803	4.83314	3.23475	1.25551	0.344169	1.41813	1.27747	0.48172	0.329421	0.524295
GhNPF1.6	Ghir_A05G025170	0	0	0	0	0.193418	5.425	1.86132	0	0.358739	0.184233	0.13941	0.0474103	0.407914	0.258143	0	0	0	0.0114742	0	0	0.0299948
GhNPF1.7	Ghir_A08G026340	2.31807	0	1.24411	7.30744	0.208784	1.04834	0.0824105	0.131614	0.562374	0.0391451	0.163714	0.362108	0.508292	0.153025	0.761605	1.26943	3.46364	0.0433527	0.149105	0.933431	1.07397
GhNPF1.8	Ghir_A09G002220	0.168028	33.4479	0.732115	9.87546	0.54317	0.0852502	0	0.199384	0	0.146308	0.0175362	0.214976	0	0	0.11033	0	0	0.0114313	0.0567195	0.460667	0.215636
GhNPF1.9	Ghir_D03G007520	0.130348	0	0.307071	0.090867	0.406335	0.250312	0	0	0	0	0	0	0	0	0	0	0.228007	0	0	0	0.0666102
GhNPF1.10	Ghir_D05G013190	44.0349	1.16124	9.67703	3.46697	30.576	4.15355	5.70379	4.0356	1.4952	1.34406	7.69224	2.59299	2.75958	5.54289	4.59698	2.29897	6.54585	0.419381	0.72032	1.27847	4.12244
GhNPF1.11	Ghir_D05G025340	0	0	0	0	0	2.00553	0	0	0.230871	0.056061	0	0.0474103	0.0815827	0.399317	0	0.110182	0	0.0114742	0	0	0.0857267
GhNPF1.12	Ghir_D09G002130	0	5.16677	0	3.01108	0	0.0499862	0	0	0	0	0	0.0250813	0	0	0	0	0	0.057212	0	5.54278	1.40145
GhNPF2.1	Ghir_A08G001240	7.50002	1.92687	2.50894	2.58921	1.11544	0.89198	0.691267	1.68357	3.0533	2.69822	3.24021	2.01282	2.40044	1.4188	1.40394	0.355328	3.77413	0.634697	0.849106	0.957917	1.01918
GhNPF2.2	Ghir_D08G001250	2.12294	1.2102	1.15433	1.13404	0.700327	0.502002	1.93319	0.501991	0.970849	0.542219	0.930096	0.516837	0.567342	0.71169	0.284242	0.774196	1.77717	0.535406	0.309638	0.157901	0.347342
GhNPF2.3	Ghir_A05G010300	2.02493	2.89295	0.176538	0.0814085	0.081843	0.0476454	0.0852731	0.0182836	0.0296309	0.0427363	0.0610576	0.256855	0.749924	5.80174	1.37108	0.833638	0	0.84269	2.45659	2.62278	2.3095
GhNPF2.4	Ghir_A05G010310	2.02493	2.89295	0.176538	0.0814085	0.081843	0.0476454	0.0852731	0.0182836	0.0296309	0.0427363	0.0610576	0.256855	0.749924	5.80174	1.37108	0.833638	0	0.84269	2.45659	2.62278	2.3095
GhNPF2.5	Ghir_A07G012310	2.71105	0.155066	5.68778	0.20741	0.10846	0.117436	0	0.160173	0	0.0595713	0	0.0515922	0	0	0.180268	0.1199	0	0	0	0.072731	0.10373
GhNPF2.6	Ghir_D05G010020	7.5934	2.52985	7.32454	0.579159	0.121693	0.40891	0.296807	0.239538	0.142706	0.0466515	0.264224	0.221035	0.287089	5.11248	2.40907	1.95301	0.251248	0.262462	1.55324	10.899	6.78381
GhNPF2.7	Ghir_D05G010030	7.5934	2.52985	7.32454	0.579159	0.121693	0.40891	0.296807	0.239538	0.142706	0.0466515	0.264224	0.221035	0.287089	5.11248	2.40907	1.95301	0.251248	0.262462	1.55324	10.899	6.78381
GhNPF2.8	Ghir_D07G012460	0.342679	0	0.551862	0	0.154831	0	0	0	0	0.11407	0.053595	0.0469786	0	0	0.100236	0	0	0.0177865	0	0	0.250852
GhNPF2.9	Ghir_A01G021420	0	0	0.0459629	0	0	0.0741139	0	0.195456	0	0	0	0.017359	0.051379	0	0	0	0	0	0	0	0
GhNPF2.10	Ghir_D01G022950	0.185426	0	0.0368346	0	0.106067	0	0.467766	0.0334317	0	0.0582568	0	0	0	0.0777405	0	0	0	0	0	0	0
GhNPF2.11	Ghir_A03G007560	0.0416335	1.65338	0	1.41424	0	0.0835981	0.149619	0	0.0785865	0	0.177592	0.202822	0.0395105	0	0.103273	0.112515	0	0	0.0799472	0	0.293231
GhNPF2.12	Ghir_A12G018490	5.67615	0.86571	1.79927	88.3974	100.613	3.49094	10.3506	14.2435	27.252	13.6831	17.5228	10.5577	7.94233	4.67587	12.3395	19.1355	32.7774	13.1212	5.1443	0.236878	9.44886
GhNPF2.13	Ghir_D03G010070	0.664389	1.42136	1.09553	3.31506	0.25747	0.0835981	0.0803485	0	0	0	0	0.0308816	0.158043	0.0347826	0	0	0.0497218	0	0	0.0807761	0.0514242
GhNPF2.14	Ghir_D12G018790	19.3004	4.21317	13.9508	76.7973	352.996	9.07665	225.442	7.78464	25.0965	11.976	10.9273	7.03181	4.86899	3.56293	9.25558	8.68797	19.2907	4.67059	1.30742	0.236878	4.18424
GhNPF2.15	Ghir_A04G010560	0.986077	0.853376	30.3819	5.05363	105.229	77.0737	209.997	2.5155	4.11597	3.68323	15.5023	11.1694	23.4836	29.0568	8.41835	4.83887	6.69079	5.97062	8.66868	44.5282	22.9725
GhNPF2.16	Ghir_D04G014790	0.777039	7.02255	2.41389	25.4263	338.876	19.4607	213.076	0.240981	1.53507	1.04341	14.6062	5.75102	16.0457	14.0285	12.0271	6.92838	11.4665	4.10199	12.797	71.0423	27.343
GhNPF2.17	Ghir_D12G005150	0.115674	0.199698	0.187103	0	2.07878	3.86362	19.569	11.0645	28.8835	9.98247	44.6033	24.7913	32.8627	33.2461	12.7218	5.21411	0.240068	16.2407	31.5829	12.96	8.45986
GhNPF2.18	Ghir_A05G033530	0	0	0	0	0	0	0.314366	0	0	0	0	0	0.0875221	0.120198	0.147766	0	0	0	0	0	0
GhNPF2.19	Ghir_A12G005200	0.11989	0.0625315	2.13475	0.0613445	0	4.44976	0	10.3094	31.0488	14.4005	41.7851	21.5598	34.1312	23.6163	5.15189	1.51626	0.0670055	11.3255	9.5671	5.00043	3.78437
GhNPF2.20	Ghir_D05G033330	0.0475145	0	0	0.0456969	0.102173	0	0	0.237367	0.367752	0.0561178	0.910161	0.279811	4.07644	1.48762	19.5621	3.50144	0.1295	0.167198	0	0	1.08635
GhNPF3.1	Ghir_A03G011360	7.70293	5.97981	5.20229	1.29065	0.499964	1.94559	0.068873	0.928558	1.19608	0.798444	0.408192	0.988285	0.741222	0.880028	1.09137	0.894949	0.849757	1.29036	2.56569	0.515825	0.732177
GhNPF3.2	Ghir_A03G011400	7.70293	5.97981	5.20229	1.29065	0.499964	1.94559	0.068873	0.928558	1.19608	0.798444	0.408192	0.988285	0.741222	0.880028	1.09137	0.894949	0.849757	1.29036	2.56569	0.515825	0.732177
GhNPF3.3	Ghir_A10G013540	0	0	0	0	0	0.0328679	0	0	0	0	0	0	0	0	0	0	0.220802	0.0144612	0.0269244	0.099701	0.0189015
GhNPF3.4	Ghir_A13G005380	9.46903	2.22509	256.945	17.2829	272.041	39.842	292.679	5.38476	18.7398	7.18718	13.7256	4.29455	5.57231	5.27713	0.189312	0.453551	0.560652	0.612345	1.42841	0.578993	0.192999
GhNPF3.5	Ghir_D02G011850	4.15909	12.6158	1.26288	1.15487	0.797538	0.196452	0.674927	0.266991	0.440573	0.466298	0.635519	0.452246	0.457707	0.50918	2.22273	3.02045	1.92665	0.510981	1.61171	0.160629	1.86794
GhNPF3.6	Ghir_D02G011870	0	0.0719675	0.139068	0.132869	3.1961	2.25146	1.22567	11.7564	3.56721	10.4165	5.27742	4.6377	2.94566	3.76845	4.27022	0.307237	0.067886	2.73527	0.713602	30.178	8.22391
GhNPF3.7	Ghir_D10G014050	0	0.0456116	0.0500613	0	0	0.302546	0	0.0846795	0.539554	0.368538	0.313799	0.121423	0.206836	0.0733275	0	0	0.0488751	0.0876246	0.0857745	0	0.0301078
GhNPF3.8	Ghir_D13G007010	1.11208	1.44511	92.3517	12.0518	45.7386	8.1217	61.4486	0.151473	1.4755	0.263804	0.78834	0.240538	0.715793	0.445989	0.226984	0.340163	0.0501075	0.0662123	0.600666	0.128403	0.140033
GhNPF4.1	Ghir_A07G021310	0.247722	3.76659	0.51529	0.436356	6.1368	0.0968325	0.507084	0	0.0301102	0.0647516	0.535505	0.138236	0.192998	0.172814	1.58811	1.17294	0.471627	0.062496	0	0	0.572519
GhNPF4.2	Ghir_D07G021480	0.920843	2.12021	2.89914	0.496352	1.22736	0.325698	31.6572	0.185794	0	0.0647516	0.350618	0.158545	0.192998	0.518444	1.72938	0.781961	0.471627	0	0.0252511	0.266037	1.06778
GhNPF4.3	Ghir_A05G007500	0	0.129208	0	0	0	0	0	0	0.136337	0.145752	0.163094	0.178438	0	0	0	0	0	0	0	0	0
GhNPF4.4	Ghir_A06G015610	0.293389	0.163449	4.31045	0.160443	0	1.04992	0.155616	0	0	0.0842262	0	0.193132	0.137958	0.167583	0	0	0	0.0131537	1.16696	0.052365	0.051578
GhNPF4.5	Ghir_A10G016170	3.3487	4.3821	8.19247	2.29218	1.44127	2.40321	1.10176	4.54244	5.1035	3.99401	14.2775	4.759	13.5855	5.4708	1.5013	1.7763	0.274469	2.30185	1.67118	3.77319	4.1645
GhNPF4.6	Ghir_A11G029930	3.26195	1.94853	2.43415	2.62756	0.295112	2.42751	0.956014	4.97831	6.94816	3.51692	6.34671	3.63484	4.15301	1.72553	2.12366	2.50117	5.30949	2.13678	1.83374	3.47412	2.09215
GhNPF4.7	Ghir_D05G007570	0	0	0.0537206	0	0	0	0	0	0.0274201	0	0.0189605	0.0325746	0	0	0	0	0	0	0	0.0491883	0
GhNPF4.8	Ghir_D06G015250	0	169.123	0	0.103496	0.108829	0	0	0	0	0	0	0	0	0	0	0	0	0	0	0	0.0816884
GhNPF4.9	Ghir_D06G016370	0.089578	1.11353	0	0	0.102032	0	0	0	0	0	0.100695	0.0916271	0.15767	0.0658285	0	0	0	0.0441911	0	0	0
GhNPF4.10	Ghir_D10G008840	1.56618	4.09027	4.45552	1.5843	0.402469	0.585989	0.216391	1.69793	1.93747	1.12946	11.4188	2.84394	7.7808	1.1062	1.13273	1.66845	0.755885	0.788567	0.30181	2.14044	2.49245
GhNPF4.11	Ghir_D11G030070	2.91582	3.04849	6.21955	3.77414	2.97852	6.02386	0.731205	6.16508	7.56782	5.87277	7.11199	5.67448	4.97645	3.59692	3.69053	2.52941	3.32177	2.56907	3.57417	6.2001	3.45591
GhNPF4.12	Ghir_A08G024100	2.71531	2.9537	0.0942576	0.0565895	0	0	0	0	0	0.12215	0	0.0337393	0.0431667	0.0434996	0	0	0	0	0	0	0
GhNPF4.13	Ghir_D08G025010	27.0288	16.3194	1.74277	1.07671	0.150515	0.0267588	0.370649	0.237826	0.105189	0.473069	0.21406	0.372732	0.127848	0.48011	0	0	0.0500105	0.139334	0.263169	0	0.16068
GhNPF4.14	Ghir_A03G011410	0.727725	1.1216	0.164275	1.19399	0	1.03514	0.0947585	3.00924	1.04872	1.37309	1.23801	1.60343	0.491258	0.257995	0	0.132694	0.117278	0.315145	0.102831	0.285586	0.345576
GhNPF4.15	Ghir_A05G020400	4.71609	1.04603	0.823765	0.522031	0	0.307594	0	0	0	0	0	0	0	0	0	0.0580157	0.092155	0	0	0	0.0876115
GhNPF4.16	Ghir_A05G020410	4.71609	1.04603	0.823765	0.522031	0	0.307594	0	0	0	0	0	0	0	0	0	0.0580157	0.092155	0	0	0	0.0876115
GhNPF4.17	Ghir_A06G013460	0	33.7426	0	0.191876	0	0	0	0	0	0	0	0	0	0	0	0	0	0	0	0	0.064267
GhNPF4.18	Ghir_A12G017790	2.77243	2.19113	2.59067	4.3513	0.504269	0.836487	0.336118	3.773	2.87837	3.8913	2.61828	2.16362	1.91594	1.31806	1.5201	1.01105	0.658102	0.458593	0.0897567	0.181374	0.664577
GhNPF4.19	Ghir_A12G018540	0	0.114803	0.356367	0.729068	0.40912	0.264066	0	0.148636	0.182055	0.066311	0	0.12762	0.096499	0.0864074	0	0	0	0	0.0252511	0	0
GhNPF4.20	Ghir_A13G005080	0.135774	5.40517	2.23964	13.0312	0.56065	0.651031	2.30468	2.35189	1.0677	1.17614	1.53992	1.35021	0.707557	1.14933	5.68567	6.83707	3.84997	0.257239	0.166563	2.80053	8.12055
GhNPF4.21	Ghir_D02G011830	2.88849	0.229165	0.29825	1.46719	0	3.10555	0	2.84112	0.454676	4.15505	2.55387	1.07756	0.914816	0.302441	0	0	0.216169	0.432732	0.187193	0.14646	0.15494
GhNPF4.22	Ghir_D05G020360	0	0.8677	0.58781	0	0.105222	0.0589221	0	0	0	0	0	0	0	0	0	0	0	0	0	0	0.0689865
GhNPF4.23	Ghir_D05G020370	24.0344	1.02466	3.52784	1.0337	0.259931	14.5265	0.380976	0.221723	0.135616	0.288965	0.0550059	0	0.126976	0.0359594	1.52616	2.55907	5.15557	0	0.0225486	0	1.7917
GhNPF4.24	Ghir_D12G018040	3.39883	4.4763	6.51137	6.09617	0.796773	1.84848	0.514981	3.69454	2.65787	2.72365	1.23047	1.21978	2.10226	1.07604	0.906025	0.342823	0.514536	0.443299	0.0221535	0.79494	0.611151
GhNPF4.25	Ghir_D12G018820	0	0.0957939	10.8608	0.376232	3.24039	0.220341	5.57549	0.290546	0.050249	0.253006	0.0173731	0.208932	0.161041	0.788233	0.0998141	0.108747	0	0.757711	9.59812	4.91258	0.11422
GhNPF4.26	Ghir_D13G007110	0.405296	0.653662	3.81962	14.6089	0.408944	0.120084	3.43815	7.71248	1.94531	1.35813	3.49913	1.70197	1.61834	1.29305	4.01333	5.27726	3.52407	0.389989	0.415	2.39414	12.6731
GhNPF4.27	Ghir_A03G017020	4.75706	0.268305	2.30169	8.82278	24.02	1.61838	0.965552	5.36204	5.44663	7.08018	4.70495	26.4901	6.5126	9.16454	4.64156	2.80068	1.14471	35.4828	48.8607	186.669	47.3358
GhNPF4.28	Ghir_D02G018280	4.40448	0.396498	3.20588	11.4839	10.0574	1.08003	0.924534	4.61242	3.37045	3.85721	2.5134	29.1979	9.90169	11.1547	2.48743	2.97967	2.34994	93.4257	90.9471	31.2386	13.2748
GhNPF4.29	Ghir_A05G026150	0.133424	0	0.156091	0	0.0489025	0.0854065	0.212308	0.153558	0.293974	0.190829	0	0.185024	0.125478	0	0.288361	0.459795	0.203189	0.170146	0.660822	0	0.310752
GhNPF4.30	Ghir_D05G026170	0.0395766	0.144323	0.0167997	0	0	0.162534	0.0658485	0.203871	0.0747038	0.21384	0.101838	0.138826	0	0.0709123	0.732061	0.855646	1.20842	0.0915225	0.248777	0	0.68037
GhNPF5.1	Ghir_A06G019250	8.17175	1.15857	4.32718	4.22271	1.48677	12.4096	1.36496	1.10745	1.06071	1.0821	4.43341	1.49571	3.70267	1.76424	0.332996	0.342155	0.382769	1.01598	0.478912	0.3275	0.485787
GhNPF5.2	Ghir_A10G018590	0.8596	2.81307	3.55378	0.579157	10.6867	0.685593	8.04934	0.184878	0.02635	0	0.126815	0.071898	0.248997	0.418443	0.0378923	0.114052	0.050401	0.073819	0	0.0472764	0.371575
GhNPF5.3	Ghir_D06G020380	8.39431	2.50527	6.7094	3.4399	2.2212	2.24545	3.47701	2.29198	3.20786	4.08513	11.5868	4.3324	6.05418	5.6207	4.74061	3.5356	2.45734	1.70315	0.862086	2.82997	3.59789
GhNPF5.4	Ghir_D10G020110	3.4997	5.31194	2.93853	1.96657	2.51846	0.685593	1.64583	0.522116	0.424039	0.226662	0.431461	0.18358	0	0.146133	0.104683	0.114052	0.181165	0.0237511	0.0810349	0	0.099841
GhNPF5.5	Ghir_A02G004240	1.44823	14.0608	11.1605	58.4661	0.558507	2.2134	6.00778	0.831281	2.77334	0.94708	22.2742	12.1385	3.38962	1.51507	9.79814	5.6944	0.404058	0.940675	1.55095	32.7537	16.9905
GhNPF5.6	Ghir_A07G016100	0	0.116624	1.3441	0	0.232409	1.63192	0	0.542465	1.50445	0.927233	1.1929	0.711045	0.73774	0.836847	0.155065	0	0	0.140741	0.0512995	0.244806	0.156948
GhNPF5.7	Ghir_A07G022140	0.0858261	3.05971	0.134378	2.15327	0.05201	0	0.288679	0	0.100891	0.144678	0.154679	0.656966	0	0.0335554	0.0180314	0.217089	0.220385	0.17445	0.140278	0.188808	0.0147754
GhNPF5.8	Ghir_D02G004590	1.10074	25.8719	3.2347	17.1138	5.06207	1.09726	10.4868	0.425657	0.698294	1.3218	1.18513	3.5292	0.243764	0.444167	2.13549	1.2282	0.177358	0.996765	0.880086	33.0303	11.2974
GhNPF5.9	Ghir_D07G016410	0.104683	0	0.158984	0	1.09208	0.165431	0.176053	0.075496	0.307291	0.261529	0.252116	0.0677528	0.103076	0.0877775	0	0	0	0	0	0	0.0604673
GhNPF5.10	Ghir_D07G022230	0.0401646	0.516757	0.0661808	0.607216	0	0.0549828	0.0668265	0.259058	0	0.994335	0.634671	1.7706	0.279228	0	0	0	0.0479675	0.864922	0.182371	0.200877	0.0643921
GhNPF5.11	Ghir_A05G024920	0.449511	0.960608	0.0521328	0	0	0.0544665	0	0.494422	1.01732	0.117204	0.47472	0.406672	0.596961	0.529381	2.44246	1.26693	0.386539	0.189763	0.0446548	0	0.828815
GhNPF5.12	Ghir_A05G041290	0.449511	0.960608	0.0521328	0	0	0.0544665	0	0.494422	1.01732	0.117204	0.47472	0.406672	0.596961	0.529381	2.44246	1.26693	0.386539	0.189763	0.0446548	0	0.828815
GhNPF5.13	Ghir_A10G019000	0.63169	0.469163	10.6275	0	0	4.36164	0	0.355747	0.247524	0.309783	0.966586	0.772406	3.45571	4.18977	5.18168	2.39671	0	0.895606	1.50587	0.380306	3.22759
GhNPF5.14	Ghir_A12G017060	0	0.177662	0.294425	1.71901	0	0.13917	0	0	0.0634755	0.0682517	0.0658385	0	0	0	0.0228201	0	0	0	0	0.280348	0.176198
GhNPF5.15	Ghir_D04G001680	0.13952	2.06371	1.09167	0	0.159373	0.439499	0	0	0	0	0	0.0316118	0.125725	0.19348	4.43905	1.26693	0.803337	0	0	0	0.786242
GhNPF5.16	Ghir_D05G024960	2.69266	0.36558	12.1238	11.9788	0	1.16912	0	3.32448	1.07673	3.65142	0.212662	2.66843	0.4513	0.765073	0.02025	0.609504	0.10774	0.180393	1.76354	0.174972	0.732444
GhNPF5.17	Ghir_D10G020570	0.852162	0.100271	17.338	0	0	3.1098	0.302735	0.72786	0.529017	1.02208	1.44244	1.81791	1.33553	3.86886	8.65575	6.14679	0	0.344198	1.02217	2.68978	5.07318
GhNPF5.18	Ghir_D12G017300	0	1.38504	11.1003	0	0	4.01455	0	0	0.247425	0	0.17109	1.42987	1.58593	5.6324	6.88079	2.14187	0	0.77852	2.87846	0.858995	3.83878
GhNPF5.19	Ghir_A12G017050	4.13233	0.227545	1.36035	62.2847	0.0946719	0.236802	0.342776	0.139811	0.145637	0.48949	0.677484	0.492219	0	0.0693886	0.0612898	0.104658	0	0	0	0.40754	0.508018
GhNPF5.20	Ghir_D12G017290	0.351797	2.10348	0.562082	56.5057	0.0473205	0.112686	0	0.382344	0.646616	2.19966	0.0533095	1.17822	0.208017	0.216263	0.250849	0.77861	0.0491541	0.0417914	1.37966	0	0.814553
GhNPF5.21	Ghir_A09G011550	0.79198	0.311102	1.67212	0.495046	0.258872	6.77951	0	12.9377	10.7415	10.3283	7.2894	8.1516	3.54654	3.44671	3.48723	2.14633	1.45261	4.01293	0.683362	0.102615	1.11057
GhNPF5.22	Ghir_A09G011560	0	0.390402	2.64527	0.845181	0	0.847118	0.629411	1.12966	0.330594	0.47033	0.302466	0.073755	0.700931	0.146322	2.37475	0.473322	0.418335	0.643215	0.332103	0.335546	1.11364
GhNPF5.23	Ghir_A09G016150	4.76741	18.51	5.70302	0.908108	0.249504	1.35364	0	0.234646	0.441522	0.0744116	0.19336	0.0919369	0.0826736	0.182572	0.325998	4.4662	10.971	0.011627	0.0216477	0.0338745	1.26063
GhNPF5.24	Ghir_D09G011090	0	0.249042	0.175001	0	0	0.114541	0	0.337373	0.0979765	0.214081	0.112915	0.160449	0.418668	0.137421	0.165565	0.141358	0	0.0441143	0	0	0.0645416
GhNPF5.25	Ghir_D09G015600	1.44258	6.99173	2.36724	0.23832	0	1.44798	0	0.745791	5.37028	1.50583	4.73339	1.02614	2.34981	1.25847	0.13958	0.558275	3.36184	0.356345	0.562623	0.228072	2.88956
GhNPF5.26	Ghir_A05G037450	0.779553	4.29134	1.17753	0.379548	0.766628	0.595741	1.65202	0.84095	1.47311	1.61374	1.76877	0.892046	2.01424	2.75096	7.51045	3.97545	0.724076	0.54921	0.288787	14.2281	5.38749
GhNPF5.27	Ghir_A09G002600	11.1036	2.16321	1.94805	14.3473	0.112141	0.996398	9.85444	1.00477	0.835902	1.07404	2.45185	2.20793	4.48834	3.6437	3.30293	1.48763	1.51022	1.19149	0.760503	2.21032	3.14897
GhNPF5.28	Ghir_D04G005570	1.61766	11.8727	0.677099	0.050262	0.218083	0.130039	1.22066	0.42704	1.32761	0.557002	1.78702	0.985982	2.10149	1.05966	8.74099	5.34201	0.844251	0.303001	0.288787	9.50676	9.00678
GhNPF5.29	Ghir_D09G002550	4.15653	6.65444	0.380229	9.90968	0.224282	1.36901	10.9321	6.03063	9.24358	6.23991	27.0566	8.25593	21.8522	9.70375	11.8143	5.70259	3.60084	5.53665	2.80201	24.5356	16.9981
GhNPF5.30	Ghir_A02G009900	2.51358	3.96876	3.83927	5.30874	2.24533	2.21717	2.24466	4.13305	7.22822	5.36349	4.67939	3.19339	2.92622	2.64251	1.91563	2.03975	0.596861	2.34695	2.92223	2.19156	1.81407
GhNPF5.31	Ghir_A05G027860	7.97284	5.44585	4.56466	7.94084	0.211286	1.76687	0.310598	1.58109	2.95974	1.36414	2.51426	1.83825	1.42458	2.03361	2.02746	4.08751	3.65998	2.03875	1.99909	1.84075	2.99904
GhNPF5.32	Ghir_A13G012570	0.0440054	2.48755	2.26427	0.247204	32.3165	2.82332	27.5198	9.40343	16.7183	7.83643	24.7838	13.0585	16.0318	28.6735	29.2189	15.3413	1.41751	6.98569	19.5563	117.279	58.77
GhNPF5.33	Ghir_D02G010420	11.8131	12.8375	8.68561	17.4055	22.4271	5.87139	13.9064	7.09825	8.42845	7.28227	9.9688	8.58051	5.6767	7.8312	4.67929	4.42394	3.84649	6.5105	7.93169	7.53023	5.07917
GhNPF5.34	Ghir_D05G027900	3.61327	0.985241	2.14656	3.75662	0.583445	1.18163	0.214421	2.82923	2.96202	1.90889	5.5776	2.23427	2.01739	1.66067	1.0628	1.61247	1.48097	1.33639	0.998345	1.02218	1.44653
GhNPF5.35	Ghir_D13G013140	0.802296	8.55692	0.729514	2.18831	0.68328	0.718888	4.35478	0.680056	2.81652	0.553372	5.7377	3.06721	3.24449	8.79371	73.5708	34.726	3.65314	0.669558	13.0662	356.696	153.697
GhNPF6.1	Ghir_A11G016270	0.434941	0.144127	0.491066	2.22317	0.100809	0	0.375968	0	0	0	0	0	0	0	0	0	0	0	0.201589	0	0.0455048
GhNPF6.2	Ghir_D11G016340	0.304839	0	0.349903	2.28564	0	0	0	0	0	0	0	0.0299589	0	0	0	0	0	0	0.0775674	0.0452536	0.0201779
GhNPF6.3	Ghir_A06G005900	5.3079	20.0557	6.74683	2.76113	0.103371	0.347311	0.596586	1.92964	0.930163	1.62006	0.668173	1.24608	0.841776	0.111091	0.0669216	0	0.13102	0.0905255	0.169806	0	0
GhNPF6.4	Ghir_A07G004050	12.2499	0.243223	122.939	13.5884	8.16121	10.3022	32.3856	0.544019	0.390078	0.353797	2.86306	0.553472	1.23821	0.291675	0.401898	0.447475	0	0.457301	1.51042	4.27142	1.1478
GhNPF6.5	Ghir_A13G019570	15.4311	4.0717	59.7354	6.73515	154.065	2.5823	25.1559	0.066068	0.10769	0.0968643	0.182873	0.113453	0.677465	0.568346	0.561074	0.34758	0.470476	0.0844415	0.232008	0.166336	0.217434
GhNPF6.6	Ghir_D06G005950	0	0	1.75828	0	0.79305	0.83838	2.2009	0	0	0.561415	0.528825	0.846998	0	0	0.969257	0	0	0.426795	0	0	1.00876
GhNPF6.7	Ghir_D06G005980	0.632496	33.4956	5.12213	0.836948	0	0.0887504	0.596586	0.490555	0.451269	0.37942	0.288446	6.71428	1.98623	0.999822	0.305653	0.571372	0.201998	26.6195	36.4016	0.129403	0.0733461
GhNPF6.8	Ghir_D07G004100	7.12503	0.406628	52.8204	3.04758	4.93689	10.3822	8.93761	0.341233	0.161207	0.247538	0.711642	0.538463	0.422843	0.505074	0.0191706	0.115403	0	0.269537	0.208724	5.93782	0.359089
GhNPF6.9	Ghir_D13G020310	5.37592	0.816501	51.4279	3.72513	16.7461	1.72747	23.9786	1.27155	2.0047	0.498632	0.218162	0.121925	0.465927	0.492805	0.162792	0.114949	0	0.119686	0.230191	0.0825165	0
GhNPF6.10	Ghir_A03G001460	0.575263	19.2041	0	0.576906	0.453302	0.168822	0.442034	0	0	0	0.30564	0.249454	0.380705	0.150646	0	0	0	0.128044	0.344909	0	0.14584
GhNPF6.11	Ghir_A03G001470	0	0	0	0	0	0	0	0	0	0	0	0	0	0	0	0	0	0	0	0	0
GhNPF6.12	Ghir_A03G001480	9.02678	8.36817	3.38781	4.66432	0.924914	2.58582	0.37209	0.542286	2.72051	4.70397	20.6797	9.60099	6.24744	4.04202	0.616699	0.227216	0.18046	3.79627	0.836723	1.18548	2.3113
GhNPF6.13	Ghir_A08G017860	0.178964	0	0.968101	2.58442	11.4589	0.622959	0.671625	1.12279	1.13154	1.24241	0.250219	1.14004	0.335176	3.00125	13.338	6.22425	1.76788	0.0896528	0.862677	0.668292	5.7339
GhNPF6.14	Ghir_A12G023240	0.633331	10.1562	0.136161	4.1064	0.205138	0.0574361	2.93463	0.086815	0.0523935	0	0	0.0580266	0.0398172	0.110229	0	0	0.360222	0.108811	0.102548	0.094005	0.0882112
GhNPF6.15	Ghir_D03G017590	9.21905	14.8466	3.60644	5.43514	1.17041	1.11428	0.650601	0.302946	1.21171	1.79572	22.5916	12.4757	10.7613	7.58226	0.520371	0.113388	0.0501075	4.36331	1.0768	0.175405	1.86901
GhNPF6.16	Ghir_D03G017600	0.305774	15.8634	0	0.622869	1.12434	0.06137	0.581922	0	0.0262476	0	0.053723	0.0311818	0.411938	0.210724	0	0.113608	0.050205	0.0473183	0	0	0.10938
GhNPF6.17	Ghir_D08G018760	0.585632	0	1.31776	5.636	1.67715	1.66565	0.220589	2.81152	3.58518	4.11497	2.84614	6.82522	2.49276	8.57477	17.3207	4.53551	1.38131	9.1834	13.6463	8.33619	5.11301
GhNPF6.18	Ghir_A07G017680	191.123	24.492	26.6016	52.6242	54.4129	15.6372	17.388	6.67577	1.52801	1.13428	1.85229	2.26168	1.24199	0.812755	1.82455	0.111442	0.275516	0.769362	0.223195	1.00631	1.05674
GhNPF6.19	Ghir_D07G018430	92.9547	11.3165	24.6175	52.5215	127.425	12.9799	24.6165	0.117099	0.285602	0.0931706	0.105397	0.122349	0.495096	0.068902	0.0185126	0	0	0.0418707	0.223195	0.341458	0.326215
GhNPF7.1	Ghir_A06G012350	0	0	0	0	0	0	0	0	0	0	0	0	0	0	0	0	0	0	0	0	0
GhNPF7.2	Ghir_A13G022680	0	0	24.5797	0.185503	0	0	0	0	0	0	0	0	0	0	0	0	0	0	0	0	0
GhNPF7.3	Ghir_D06G012150	0	0	0	0	0.154709	0	0.773405	0	0	0	0.0550059	0.0957793	0	0	0	0	0	0	0	0	0
GhNPF7.4	Ghir_D13G023340	0	0	10.8792	0	0	0	0.14735	0	0	0	0	0	0	0	0	0	0	0	0	0	0
GhNPF7.5	Ghir_A03G000790	0.214606	1.24087	0	0	0.146267	0.133718	0	0.481961	0.203852	0.0373038	1.02745	0.349946	0.848718	0	0	0	0	0	0	0	0.0149692
GhNPF7.6	Ghir_A06G016960	0.386587	0.0977949	0.303571	4.12901	0.0531955	0.112472	0	0	0	0	0	0	0	0	0	0	0	0	0	0	0.0151109
GhNPF7.7	Ghir_A08G014360	0	0	0.647355	0	3.89102	0.859466	0.121165	2.59004	1.02556	0.733983	1.287	0.453078	0.191682	0.607331	1.40447	0.509016	1.55835	0.0459859	0	0	0.263474
GhNPF7.8	Ghir_A08G016730	10.7878	19.0023	9.04931	4.32477	147.35	1.98697	309.887	0.0315339	0	0	0.0176689	0.0131218	0.284512	0.175899	0.886532	1.76958	2.48992	0.0530725	0.0428873	5.49361	1.93175
GhNPF7.9	Ghir_A13G001050	5.62063	1.43599	69.5924	0.550096	43.8787	1.15795	91.8731	0.112592	0.971213	0.0532374	0.134891	2.07842	0.471951	0.454586	0.196701	0.321455	0	0.143114	0.0207779	0.186395	0.476319
GhNPF7.10	Ghir_D03G018390	0	1.20169	0	0	0.889422	0.274836	0.584964	0.534807	1.02279	0.23721	1.61706	0.730076	1.05858	0.145827	0	0	0.0485992	0.0527741	0	0	0.0909261
GhNPF7.11	Ghir_D06G017930	0.924525	0.05201	3.33422	12.2616	0	0.112472	0.0683495	0	0	0	0	0	0	0	0	0	0	0	0	0.306484	0.15764
GhNPF7.12	Ghir_D08G015240	0	0	0.0410327	0	0.187759	0.957181	0	3.276	4.31034	0.897337	1.50744	1.09194	0.677002	0.306023	0.21808	0	0	0.0271853	0	0.0937131	0.0837878
GhNPF7.13	Ghir_D08G017550	2.45592	28.8631	5.20056	5.33228	220.671	2.12516	193.337	0.116213	0	0	0.0176689	0.134545	0.0776755	0.107518	0.94165	2.32257	7.43014	0.106145	0.414505	5.48592	2.53095
GhNPF8.1	Ghir_A01G021940	0	0	0	0	0	0	0.365785	0	0	0	0	0	0	0	0	0	0	0	0	0	0
GhNPF8.2	Ghir_A03G005790	13.1585	19.4233	5.15328	19.7809	3.79819	1.5649	9.84093	3.7728	5.81569	3.5776	11.9168	7.78858	3.32472	3.93589	2.81401	1.87232	2.58277	9.7788	10.9832	4.08281	4.012
GhNPF8.3	Ghir_A05G009240	3.58783	3.62465	0.574328	106.65	0.401704	0.843541	0.147629	0.444925	0.232031	0.166804	2.92999	0.819379	0.289824	0.368031	0.454172	0.111019	0.0490608	0.0417123	0.0645745	0.40753	0.996583
GhNPF8.4	Ghir_A04G013880	10.9154	23.5258	6.33567	13.6217	8.89148	4.44374	14.778	8.21798	9.09726	5.66184	10.8877	7.45145	5.42544	8.51743	5.98417	5.12232	4.52169	5.55553	6.96375	8.47212	4.98673
GhNPF8.5	Ghir_A08G000650	0.0914291	36.5262	0	0.0467817	0.104598	0	0	0	0	0	0	0.0317369	0.0406048	0	0	0	0	0.0240787	0	0	0.0157361
GhNPF8.6	Ghir_A09G017230	6.12088	6.94238	2.60835	0.709919	4.84809	9.36871	12.1909	14.9717	18.7477	5.98008	28.7929	14.597	21.2986	12.9354	10.1093	15.5949	11.0968	2.43061	1.57534	2.79644	10.0752
GhNPF8.7	Ghir_D03G013080	15.5778	22.6212	9.12606	25.3933	1.26397	3.37873	0.766528	4.58592	9.65402	6.9154	13.6539	10.3902	5.90531	7.27205	4.05382	2.3404	1.91194	17.1975	16.0698	10.753	5.168
GhNPF8.8	Ghir_D05G009250	1.0086	1.17578	1.25774	14.2975	0.201234	1.8481	0.147911	0.944994	1.05838	1.94488	1.72508	0.807742	0.372735	0.840618	0.0184774	0.44492	0.451674	0.178749	0.0215656	0	0.208778
GhNPF8.9	Ghir_D04G018340	6.49364	11.224	2.45641	11.6335	3.06459	3.15214	7.6749	3.51788	3.86335	3.20274	6.51387	4.26994	2.68406	2.09787	2.08061	2.04893	2.67277	2.80659	3.99279	1.12795	1.06265
GhNPF8.10	Ghir_D08G000650	0.0914291	13.0402	0	0	0	0	0	0	0	0	0	0	0	0	0	0	0	0.0434382	0	0	0.0798476
GhNPF8.11	Ghir_D09G016670	4.89597	6.49401	1.62806	4.86314	2.00897	3.90022	12.9474	13.6907	19.6819	7.7575	27.8885	15.4808	17.3614	9.26161	5.6578	7.62155	7.70227	1.83673	0.984614	1.35614	4.43723
GhNPF8.12	Ghir_A01G013690	16.055	21.0465	14.1613	22.9478	19.2301	6.25811	14.8592	6.69735	10.8721	6.42886	15.826	9.07686	6.85393	10.6463	13.9431	12.2936	10.7224	6.91839	8.58174	19.0644	13.1903
GhNPF8.13	Ghir_D01G014960	17.9109	39.3258	12.6177	45.0318	18.6495	5.75055	19.7002	7.74137	13.6517	5.76678	21.587	7.95537	6.54809	7.99932	23.1662	20.034	25.2133	6.58861	9.74359	33.1842	20.691
