# Supplementary material for: Identification and Expression Analysis of the NPF Genes in Cotton
Source: Int J Mol Sci. 2022 Nov 17;23(22):14262. doi: 10.3390/ijms232214262 (PMC9692789; doi:10.3390/ijms232214262)
Supplement: Supplementary file 1 [file ijms-23-14262-s001.zip › Supplement Table S5.xlsx]

## Sheet: Supplement Table S5
Table S5.Differentially expression level of GhNPF gene family members under cold, hot, salt and PEG stress.
Gene name	Gene ID	ck_1h	ck_3h	ck_6h	PEG_1h	PEG_3h	PEG_6h	hot_1h	hot_3h	hot_6h	salt_1h	salt_3h	salt_6h	cold_1h	cold_3h	cold_6h
GhNPF1.1	Ghir_A08G026350	0.43648	0.592575	0.921958	0.396759	0.629379	0.958166	0.71806	0.688086	0.984619	0.544243	0.344302	0.855615	0.503694	0.860246	0
GhNPF1.2	Ghir_D08G027180	0.331163	0.39505	0	0.0980226	0.109608	0	0.412909	0.106401	0.236001	0.234665	0.205161	0.317423	0.159321	0.226401	0
GhNPF1.3	Ghir_D08G027190	3.71438	3.09807	7.40686	3.8849	2.82827	6.29296	5.74046	2.58865	3.21531	2.88404	4.78923	3.59166	6.4143	2.55271	2.85616
GhNPF1.4	Ghir_A02G013370	0.309806	0.239137	0.381699	0.23438	0.160164	0.710467	0.309362	0.486331	0.456612	0.231044	0.313825	0.565348	0.521255	0.231233	0.174343
GhNPF1.5	Ghir_A05G013420	2.04723	1.14653	2.24097	1.59172	1.20758	1.72584	1.87819	2.09525	1.02716	2.78498	1.31716	0.735823	3.4013	2.40963	1.78123
GhNPF1.6	Ghir_A05G025170	0	0	0	0	0	0	0	0	0	0	0.132686	0	0	0	0
GhNPF1.7	Ghir_A08G026340	1.31987	2.32819	8.28265	1.30363	2.68698	9.87422	2.82488	2.712	2.74602	2.17502	4.48716	9.4173	1.98334	1.87982	0.44258
GhNPF1.8	Ghir_A09G002220	4.32833	6.32111	5.71815	4.10991	7.61134	9.12504	5.94261	9.26548	3.53512	5.73759	7.56837	6.97701	8.47694	11.6776	2.20494
GhNPF1.9	Ghir_D03G007520	0	0.291714	0	0	0	0	0	0	0.0921327	0.0368774	0.0884155	0.0298494	0.0253354	0.0654716	0.0924025
GhNPF1.10	Ghir_D05G013190	3.80332	2.90815	4.11155	2.75926	2.94556	4.01678	4.30684	3.29467	3.76436	5.46436	3.76215	2.54324	7.37175	8.79014	5.12221
GhNPF1.11	Ghir_D05G025340	0.0428956	0	0	0	0	0	0	0	0	0	0	0	0	0.389478	0
GhNPF1.12	Ghir_D09G002130	0.946542	1.82237	2.22628	1.35899	1.52933	2.75724	1.15224	1.61239	0.529914	1.59457	1.95921	1.82265	1.8741	1.9057	0.968501
GhNPF2.1	Ghir_A08G001240	0.322882	0.149697	0.44948	0.060603	0.370905	1.35287	0.205028	0.837288	0.874764	0.68888	0.831368	1.09244	0.907593	0.520218	0.55177
GhNPF2.2	Ghir_D08G001250	0.0879884	0.195965	0	0.193577	0.18275	0.0936375	0.842151	0.196412	0.254475	0.263646	0.430985	0.645464	0.544921	0.175086	0.113161
GhNPF2.3	Ghir_A05G010300	0	0	0	0.0222662	0.0307563	0.0386479	0	0	0	0.0210203	0.0914333	0	0.0298037	0.116703	0.0526695
GhNPF2.4	Ghir_A05G010310	0	0	0	0.0222662	0.0307563	0.0386479	0	0	0	0.0210203	0.0914333	0	0.0298037	0.116703	0.0526695
GhNPF2.5	Ghir_A07G012310	1.27815	1.49314	1.20696	1.03809	1.00574	0.544667	2.70885	0.911361	0.543351	2.41423	1.48697	1.26534	3.79384	3.47839	2.39822
GhNPF2.6	Ghir_D05G010020	0.0749509	0.385718	0.347244	0.154954	0.359069	0.419517	0.245337	0.486071	1.02486	0.209221	0.202915	0.510679	0.193244	0.307372	0.208334
GhNPF2.7	Ghir_D05G010030	0.0749509	0.385718	0.347244	0.154954	0.359069	0.419517	0.245337	0.486071	1.02486	0.209221	0.202915	0.510679	0.193244	0.307372	0.208334
GhNPF2.8	Ghir_D07G012460	0	0	0.164139	0	0.0824238	0.099093	0.148438	0	0.067274	0	0	0.0498824	0.0387011	0.400044	0
GhNPF2.9	Ghir_A01G021420	0	0.126852	0	0	0	0.0884525	0.403578	0	0.120192	0	0	0	0.0682112	0	0
GhNPF2.10	Ghir_D01G022950	0	0	0	0.0191975	0	0	0	0	0	0	0	0.130551	0.135668	0.136748	0
GhNPF2.11	Ghir_A03G007560	0	0.052679	0.21532	0	0.0261742	0.747275	0	0.465029	1.0073	0.0771635	0	0.974909	0.0253844	0.0348846	0
GhNPF2.12	Ghir_A12G018490	32.6076	25.8393	36.5619	29.0397	39.8038	39.6781	34.7462	49.8158	67.2664	57.3762	39.7107	62.8562	23.4245	19.8418	14.0382
GhNPF2.13	Ghir_D03G010070	0.195259	1.28241	0.701666	0.138138	0.781336	0.853584	0.0973615	2.0471	3.22276	0.117378	0.202385	0.715976	0.157165	0.358704	0
GhNPF2.14	Ghir_D12G018790	17.7412	33.5259	53.186	26.7401	44.2577	47.4664	58.4227	47.7396	58.9743	28.9249	41.433	62.7438	31.1853	24.2114	12.9644
GhNPF2.15	Ghir_A04G010560	6.27298	5.55859	7.02769	4.8377	3.5489	4.85843	4.46537	4.42291	4.05188	5.47231	6.1139	3.27313	8.3858	5.45351	6.6478
GhNPF2.16	Ghir_D04G014790	7.10236	6.70617	6.34927	8.3996	10.5523	7.80578	8.65402	7.82442	9.93935	10.2669	12.5091	15.0291	15.006	10.6672	6.39685
GhNPF2.17	Ghir_D12G005150	0.0453301	0	0	0	0	0	0	0	0	0.0517527	0.0605887	0	0	0.131988	0
GhNPF2.18	Ghir_A05G033530	0	0	0	0	0	0	0	0	0	0	0	0	0	0	0.18355
GhNPF2.19	Ghir_A12G005200	0	0.131486	0	0	0	0	0	0.192313	0	0	0	0	0	0	0
GhNPF2.20	Ghir_D05G033330	0	0.0528835	0	0.0392909	0	0	0	0.0715252	0	0.077463	0.0453444	0	0.0525915	0.131706	0.082417
GhNPF3.1	Ghir_A03G011360	1.66755	1.4372	4.59523	1.65953	3.09153	3.61206	2.73801	1.94234	1.28086	1.64458	4.67815	2.91245	2.29179	0.982446	1.30775
GhNPF3.2	Ghir_A03G011400	1.66755	1.4372	4.59523	1.65953	3.09153	3.61206	2.73801	1.94234	1.28086	1.64458	4.67815	2.91245	2.29179	0.982446	1.30775
GhNPF3.3	Ghir_A10G013540	0.108351	0.240968	0	0.0740266	0.26531	0.42006	0	0.176222	0.168727	0.240584	0.219104	0.350249	0.41811	0.162247	0
GhNPF3.4	Ghir_A13G005380	50.4061	57.3465	54.1776	49.7759	79.9107	63.7584	99.0155	47.1793	39.6334	89.9198	77.8035	54.0568	87.2269	68.7205	48.4569
GhNPF3.5	Ghir_D02G011850	1.18844	1.28796	1.49856	1.23607	1.87787	2.05566	7.05148	4.47349	3.37562	1.91147	1.88442	2.05192	0.883854	0.786787	1.9104
GhNPF3.6	Ghir_D02G011870	0.801006	0.604928	0.949217	0.878351	0.367289	0.274668	1.2471	0.297511	0.131779	0.903583	1.47518	0.435867	0.388468	0.669903	2.50088
GhNPF3.7	Ghir_D10G014050	0.234978	0.28728	0.423276	0.251185	0.42342	0.569009	0	0.313258	0.134103	0.415537	1.0903	0.152505	0.48679	0.447236	0.26269
GhNPF3.8	Ghir_D13G007010	44.9618	44.084	32.2647	64.4328	83.6632	40.9301	74.8684	30.2266	25.4652	93.1694	76.0812	27.0378	113.677	91.3501	60.8097
GhNPF4.1	Ghir_A07G021310	0.0507768	0.164791	0.0602195	0.0453653	0.218328	0.0787414	0.34891	0.0825832	0.213992	0	0.0775169	0	0.0901451	0.152067	0
GhNPF4.2	Ghir_D07G021480	0.0507768	0.112925	0.124787	0.0453653	0.062663	0	0	0	0.106996	0.0428267	0.0775169	0	0	0.152067	0.202468
GhNPF4.3	Ghir_A05G007500	0	0	0	0	0	0	0	0	0	0	0.05896	0	0	0.0455356	0
GhNPF4.4	Ghir_A06G015610	0.514833	0.689403	0.120992	0.478665	0.972116	0	0.91552	1.23467	0.103742	2.1191	0.251843	0.174372	0.469184	0.836075	0.39262
GhNPF4.5	Ghir_A10G016170	1.56468	1.02888	0.948603	1.43562	1.41099	1.1074	0.594007	1.52391	1.71046	4.36317	1.271	2.77497	2.53755	2.86574	2.07851
GhNPF4.6	Ghir_A11G029930	0.728167	0.702294	0.882526	0.849902	0.910138	0.687904	0.872699	0.641171	1.60573	1.21303	1.07197	0.939411	1.23644	0.51117	1.58846
GhNPF4.7	Ghir_D05G007570	0	0	0	0	0	0	0	0.0355691	0	0	0	0	0	0	0
GhNPF4.8	Ghir_D06G015250	0.100138	0	0	0	0	0	0	0	0	0	0	0	0	0.070207	0
GhNPF4.9	Ghir_D06G016370	0.166444	0	0	0.0349893	0	0.129056	0	0.270706	0	0.222986	0	0.056815	0	0.058347	0
GhNPF4.10	Ghir_D10G008840	0.642164	1.91834	1.86059	1.85258	2.48762	1.64095	1.89934	1.53816	2.22565	4.57027	2.07195	3.11104	1.86275	1.94538	1.56445
GhNPF4.11	Ghir_D11G030070	1.53399	1.25333	1.36052	2.3986	1.2358	1.15759	2.08559	1.34477	0.898213	2.10202	1.41949	0.78743	3.34177	1.37227	2.90223
GhNPF4.12	Ghir_A08G024100	0.0697701	0.106483	0	0	0	0	0	0	0	0.212627	0.0256412	0.03576	0.373064	0.0716964	0.101187
GhNPF4.13	Ghir_D08G025010	0.981988	1.91488	1.6728	0.768819	0.29994	0.273321	0.614546	0.607224	0.783095	4.22501	1.17949	2.76029	3.00029	2.19987	0.950524
GhNPF4.14	Ghir_A03G011410	2.16419	1.24612	1.97172	1.28526	1.62404	1.79535	2.6335	1.60675	1.5157	1.50075	1.62287	1.90846	1.57955	0.909367	2.86155
GhNPF4.15	Ghir_A05G020400	3.76396	3.88182	6.42245	2.65966	2.54238	3.60825	2.55607	3.20863	2.04045	3.15972	6.51504	1.35203	5.1342	2.52306	3.66374
GhNPF4.16	Ghir_A05G020410	3.76396	3.88182	6.42245	2.65966	2.54238	3.60825	2.55607	3.20863	2.04045	3.15972	6.51504	1.35203	5.1342	2.52306	3.66374
GhNPF4.17	Ghir_A06G013460	0	0	0	0	0	0	0	0	0	0	0	0	0	0	0
GhNPF4.18	Ghir_A12G017790	7.68876	6.54841	5.98698	10.0572	12.2595	7.31275	19.7037	8.04933	3.7706	17.0469	8.99359	8.38676	23.739	15.8424	13.4747
GhNPF4.19	Ghir_A12G018540	0.628188	1.90134	2.93032	1.49172	0.658955	2.04387	2.57594	0.734386	1.76308	0.804951	1.04507	1.18304	1.21069	0.228102	1.1075
GhNPF4.20	Ghir_A13G005080	0.214458	0.335728	1.98217	0.350894	1.80156	4.15455	0.202877	3.47393	4.63363	0.498005	0.764916	10.1136	0.444391	0.426824	0
GhNPF4.21	Ghir_D02G011830	8.88657	5.31799	5.68065	9.73654	7.39067	6.73409	10.3087	4.10143	3.22083	7.64912	4.81144	6.50859	7.40708	4.28401	5.34596
GhNPF4.22	Ghir_D05G020360	0	0	0	0	0	0	0	0	0	0	0.0467039	0	0.0541683	0.135655	0
GhNPF4.23	Ghir_D05G020370	20.9127	20.0758	24.3283	15.3996	11.3263	16.8096	10.3277	9.62306	7.41552	18.6855	26.4195	6.55648	23.4476	11.0503	19.5877
GhNPF4.24	Ghir_D12G018040	21.2474	19.2797	21.8887	23.3495	32.7811	17.1364	54.1074	19.6375	10.2282	43.707	27.1359	20.7849	63.3345	41.3317	20.1925
GhNPF4.25	Ghir_D12G018820	3.78474	3.51913	3.84223	3.15487	5.04244	5.84284	10.4138	3.54777	1.25282	2.68448	4.0368	1.74148	8.03867	4.95817	3.32716
GhNPF4.26	Ghir_D13G007110	0.247605	0.939748	2.03671	0.396757	1.81923	2.24688	0.41535	2.27883	5.3163	0.393423	0.394184	5.84174	0.187799	0.932225	0
GhNPF4.27	Ghir_A03G017020	11.5861	11.1798	7.69825	12.035	9.38011	8.19905	15.7253	9.33416	7.10935	19.6897	11.7295	11.3193	13.7617	6.4342	4.07134
GhNPF4.28	Ghir_D02G018280	22.9198	19.7544	20.3113	21.8004	18.3158	22.2402	29.2576	16.3075	12.2135	35.0383	25.4937	21.2873	29.0065	14.8245	8.10373
GhNPF4.29	Ghir_A05G026150	0.179038	0	0	0	0	0.102614	0	0	0.0450844	0.15768	0	0	0	0.0670234	0
GhNPF4.30	Ghir_D05G026170	0.0832693	0	0.10232	0.074395	0.0513808	0.0954503	0	0	0	0.0733359	0.236939	0	0.0497895	0	0.166015
GhNPF5.1	Ghir_A06G019250	4.35843	7.18266	8.77981	4.6164	9.21973	8.90177	5.87941	3.08634	2.42477	4.6867	11.7826	5.76853	15.9589	8.22039	7.35395
GhNPF5.2	Ghir_A10G018590	3.50957	3.52329	1.58058	5.45893	5.5687	2.05705	5.55615	4.13168	0.984619	9.21033	7.24418	2.31576	11.3873	8.59823	2.62425
GhNPF5.3	Ghir_D06G020380	2.5681	5.12761	4.4556	2.3082	3.06381	5.06612	2.16324	1.9043	1.59081	4.55447	5.92874	2.82363	5.91402	2.92591	3.78056
GhNPF5.4	Ghir_D10G020110	4.49545	5.23154	6.16053	6.47883	8.33244	7.63519	7.54917	8.09636	4.39401	11.6594	10.8977	6.00538	13.436	13.1143	2.37458
GhNPF5.5	Ghir_A02G004240	3.1933	2.62324	11.3648	2.59077	8.10081	15.5021	4.03309	9.54409	18.097	3.1297	4.54166	21.2173	2.31901	2.22715	2.85489
GhNPF5.6	Ghir_A07G016100	0.135592	0.114725	0.126775	0.138265	0.0636615	0.159992	0.125172	0.0838992	0.0567405	0.0435091	0.106378	0.221235	0	0.231736	0
GhNPF5.7	Ghir_A07G022140	0.211278	1.87184	0.51923	0.6751	0.548373	0.424511	0.495424	0.169967	0.929053	2.71196	0.238783	0.514814	2.62143	0.156174	0.257792
GhNPF5.8	Ghir_D02G004590	0.88186	1.85769	3.47025	0.868156	1.31012	3.86021	0.50968	3.71375	4.02245	1.5681	1.27136	5.87308	1.19407	0.616332	0.438549
GhNPF5.9	Ghir_D07G016410	0.0515859	0	0	0.0460882	0	0	0	0.0396984	0	0.047355	0	0	0	0	0
GhNPF5.10	Ghir_D07G022230	0.10383	0.673125	0.261424	0.353094	0.233836	0.524219	0.205066	0.137449	0.542075	1.33028	0.460007	0.304746	1.43782	0.44292	0.336982
GhNPF5.11	Ghir_A05G024920	0	0	0	0	0	0.0665395	0	0.0345133	0	0.315984	0.0924834	0	0.0536324	0	0
GhNPF5.12	Ghir_A05G041290	0	0	0	0	0	0.0665395	0	0.0345133	0	0.315984	0.0924834	0	0.0536324	0	0
GhNPF5.13	Ghir_A10G019000	0	0	0	0	0	0	0	0	0	0	0	0	0	0	0.415831
GhNPF5.14	Ghir_A12G017060	0.160608	0	0.131567	0	0.0660678	0.249059	0	0.128269	0.171695	0	0.0286699	0.302693	0	0.16033	0
GhNPF5.15	Ghir_D04G001680	0	0.0916195	0	0.0188555	0	0	0	0	0	0	0.0240174	0	0	0.268624	0
GhNPF5.16	Ghir_D05G024960	3.37238	2.82517	7.17394	1.89637	5.76492	5.47091	8.61809	8.67271	10.0915	3.17794	4.404	13.0104	3.38096	2.16615	1.50318
GhNPF5.17	Ghir_D10G020570	0	0	0	0	0	0.0328794	0	0.0341082	0	0	0	0	0.053003	0	0
GhNPF5.18	Ghir_D12G017300	0	0	0	0	0	0	0	0	0	0	0	0	0	0	0
GhNPF5.19	Ghir_A12G017050	0.663431	2.73264	12.6416	0.980529	10.69	15.6776	5.0228	15.5619	30.764	0.96716	3.22931	31.1087	1.50867	1.33811	1.53825
GhNPF5.20	Ghir_D12G017290	1.09131	5.44257	20.6794	2.54901	20.9776	31.1312	8.3771	36.7589	39.6942	2.47422	5.34602	48.0298	2.61287	2.68905	4.55002
GhNPF5.21	Ghir_A09G011550	0.984856	0.992337	4.5186	0.847134	0.273145	1.03418	0.777898	1.04564	1.34383	0.243531	0.743156	0.634294	0.0990195	0	2.07944
GhNPF5.22	Ghir_A09G011560	0.0854085	0.224648	0.680669	0.343633	0	0.289702	0	0	0.787311	0	0.100045	0.40659	0	0.148764	0
GhNPF5.23	Ghir_A09G016150	2.00095	5.70121	1.70934	4.06435	6.96059	2.25104	5.54439	3.35266	0.967869	6.60885	3.29601	1.9478	11.4332	14.389	5.60751
GhNPF5.24	Ghir_D09G011090	0.24558	0	0.065344	0.194006	0.339977	0.382641	0	0.13682	0.1161	0.582299	0.11362	0.277445	0.0658895	0.286141	0
GhNPF5.25	Ghir_D09G015600	1.44699	2.94476	1.17518	2.09043	2.80715	1.84657	2.01211	1.84205	1.08714	2.0577	1.74634	1.18633	5.57647	4.90846	2.49781
GhNPF5.26	Ghir_A05G037450	0.0746591	0.058191	0.123068	0	0	0	0	0.03724	0.155197	0.126052	0.149685	0.0691781	0.17182	0.0678545	0
GhNPF5.27	Ghir_A09G002600	4.38736	5.68858	6.74772	5.10091	8.15655	7.77481	1.9131	5.32015	2.41521	9.64842	7.51619	7.7737	10.3051	11.9433	2.12955
GhNPF5.28	Ghir_D04G005570	0.0262678	0.10762	0.0573905	0.0432341	0.0289129	0	0	0.03724	0.155197	0.0408148	0	0.0330363	0.0578697	0.183458	0
GhNPF5.29	Ghir_D09G002550	3.92656	6.59702	6.63733	4.97656	8.08373	7.85293	1.90325	5.60057	4.37087	9.76701	6.58061	6.8639	10.7652	11.1616	4.41699
GhNPF5.30	Ghir_A02G009900	1.04864	0.832874	2.49569	1.27632	1.00448	2.27363	1.82682	1.23682	1.46512	1.78036	1.76169	1.13277	2.08237	2.97642	3.94874
GhNPF5.31	Ghir_A05G027860	3.17699	3.22004	7.41874	1.61808	3.97768	7.8528	3.57569	4.16118	5.42863	2.8037	6.34377	6.61677	2.33859	2.66611	1.36549
GhNPF5.32	Ghir_A13G012570	0.0463146	0	0.341463	0	0.114312	0.215465	0	0.039684	0.487966	0.163158	0.166212	0.198628	0	0.199236	0
GhNPF5.33	Ghir_D02G010420	8.8615	7.98428	13.0632	7.78897	10.0056	17.782	13.8992	12.4497	10.1141	12.5976	13.7722	12.5084	13.3487	15.8463	10.5127
GhNPF5.34	Ghir_D05G027900	1.1555	0.99054	2.54236	1.14701	0.848896	2.57837	1.15678	2.28241	1.64793	1.16092	2.10389	1.70836	1.61598	2.072	1.23893
GhNPF5.35	Ghir_D13G013140	1.62632	2.10733	6.32697	1.01256	1.73873	4.97141	0.543011	1.85889	2.58408	1.87632	3.60078	3.4745	1.18995	1.23511	0.738701
GhNPF6.1	Ghir_A11G016270	4.20993	4.81682	7.35743	7.35153	9.04232	7.99804	10.0855	9.03253	5.52129	11.1052	8.15837	11.2804	8.28744	3.85128	1.11936
GhNPF6.2	Ghir_D11G016340	10.0613	7.03112	10.0216	10.9405	7.75622	8.263	22.1257	10.8653	7.13968	13.8216	9.50253	8.93422	18.9697	5.07018	2.8703
GhNPF6.3	Ghir_A06G005900	13.0526	11.5106	13.7027	15.9319	12.8163	10.1463	22.2147	12.0046	6.36749	23.709	13.3026	9.45207	38.2555	30.1407	17.2189
GhNPF6.4	Ghir_A07G004050	13.2919	17.44	22.1236	28.9331	41.2142	49.7649	26.7371	16.8985	12.2025	42.4067	31.9718	19.7701	54.975	59.1292	18.4179
GhNPF6.5	Ghir_A13G019570	19.5611	25.5849	17.3997	21.5575	30.4094	11.8878	48.7953	14.7282	10.5938	46.5467	18.8761	9.79362	44.9548	53.2834	26.4321
GhNPF6.6	Ghir_D06G005950	0	0	0.86841	0	0.842797	0	0	0	0	0	0	0	0	1.02263	0
GhNPF6.7	Ghir_D06G005980	11.2651	21.0185	6.91904	17.1643	15.822	7.47619	51.8673	11.4101	3.00859	22.2232	17.0433	5.44754	80.4119	77.1567	25.6607
GhNPF6.8	Ghir_D07G004100	7.67919	7.65451	5.61296	13.8463	16.5374	12.9586	13.8146	6.93063	3.94368	23.2206	14.443	6.17751	24.2584	25.4633	9.51637
GhNPF6.9	Ghir_D13G020310	4.32763	8.01434	5.82612	5.87607	16.5909	4.95232	7.69916	5.09967	3.85867	12.9475	7.00413	4.86868	10.8493	14.0652	5.04903
GhNPF6.10	Ghir_A03G001460	0.112482	0	0	0	0	0.0357819	0	0	0	0	0.0456099	0	0	0	0
GhNPF6.11	Ghir_A03G001470	0	0	0	0	0	0	0	0	0	0	0	0	0	0	0
GhNPF6.12	Ghir_A03G001480	0.39054	1.67241	0.543554	0.606761	2.33353	1.16912	1.33221	4.25944	3.02733	2.05984	0.820979	0.665404	1.45391	1.0556	0
GhNPF6.13	Ghir_A08G017860	17.0626	11.7593	4.70864	25.3479	11.3374	5.82896	24.2341	7.45623	1.24326	29.5794	8.71317	2.00439	65.2665	39.0969	15.7408
GhNPF6.14	Ghir_A12G023240	4.35563	6.59954	4.23146	4.55693	6.26564	6.73034	2.87346	2.97794	1.85651	7.25291	6.3133	5.97311	11.164	12.9464	6.9272
GhNPF6.15	Ghir_D03G017590	1.09617	4.16601	3.40827	1.31557	5.68234	6.24221	2.04347	5.91734	5.63393	2.78966	3.54005	4.20594	2.55654	2.49954	0.279907
GhNPF6.16	Ghir_D03G017600	0	0	0	0	0	0.0328153	0	0	0	0	0	0	0	0.105676	0
GhNPF6.17	Ghir_D08G018760	11.8825	11.3278	4.98718	15.2857	13.4351	7.89421	21.5861	8.94782	1.76757	21.336	11.184	3.74817	44.4296	28.1362	9.91811
GhNPF6.18	Ghir_A07G017680	96.2234	122.564	140.901	74.0078	181.817	259.118	53.3649	61.1589	45.1168	138.407	208.963	173.064	151.608	116.901	74.5003
GhNPF6.19	Ghir_D07G018430	110.546	118.319	113.249	93.691	186.294	224.996	106.475	120.149	91.7155	150.371	186.252	191.878	170.377	126.961	80.6144
GhNPF7.1	Ghir_A06G012350	0	0	0.060248	0	0	0	0	0.154116	0	0.0834553	0.048852	0	0	0	0.188922
GhNPF7.2	Ghir_A13G022680	0.282261	0.14782	0.0548575	0.365024	0.774501	0.398505	0.505798	0.177292	0.090905	1.13661	0.668942	0.152795	0.670675	1.19303	0
GhNPF7.3	Ghir_D06G012150	0	0	0	0	0.0270636	0	0	0	0	0	0	0	0.0541683	0	0
GhNPF7.4	Ghir_D13G023340	0	0	0.10602	0	0	0.0320032	0	0.107128	0	0	0.0444812	0	0	0.0302459	0
GhNPF7.5	Ghir_A03G000790	0	0	0	0	0	0	0	0	0	0.0754141	0	0	0	0.064111	0
GhNPF7.6	Ghir_A06G016960	1.94628	1.58216	2.77289	2.06257	1.43513	2.5704	1.91335	1.83151	1.59587	1.82076	2.13399	2.44207	5.26746	4.11342	3.00056
GhNPF7.7	Ghir_A08G014360	0	0.147234	0	0	0	0	0	0	0	0	0	0	0	0.0991345	0
GhNPF7.8	Ghir_A08G016730	9.11123	17.5263	4.5576	9.83239	24.4731	4.30827	8.2073	12.0739	7.09256	21.6956	15.0897	6.43659	26.9162	19.7875	4.4743
GhNPF7.9	Ghir_A13G001050	5.19726	2.7101	0.356992	0.743127	0.591151	0.258733	2.23427	1.6566	2.12104	0.958232	0.387067	0.505503	2.22048	2.68971	4.55883
GhNPF7.10	Ghir_D03G018390	0	0	0.105219	0	0.134605	0	0	0	0	0	0.220725	0	0.128792	0.064111	0.090482
GhNPF7.11	Ghir_D06G017930	2.37356	2.16674	4.15749	2.56458	2.3144	3.50878	1.22329	2.83007	2.74036	2.76436	3.27888	3.01381	5.26586	4.41085	1.95614
GhNPF7.12	Ghir_D08G015240	0	0	0	0.0454672	0	0	0	0	0	0	0	0	0	0.040525	0
GhNPF7.13	Ghir_D08G017550	6.00239	8.20918	3.76211	6.25471	9.78458	0.49935	11.1494	8.02343	3.03754	12.5751	7.73259	2.02301	26.5478	15.572	6.81618
GhNPF8.1	Ghir_A01G021940	0	0.129579	0	0	0	0	0	0.0829255	0	0	0	0	0	0	0
GhNPF8.2	Ghir_A03G005790	1.177	3.68669	9.51913	1.17349	4.08162	12.4129	8.57532	9.50179	17.2715	3.12361	3.6106	13.8347	2.91296	2.73814	0.812218
GhNPF8.3	Ghir_A05G009240	1.24236	6.45044	12.1681	1.54466	11.0055	22.9177	7.10256	22.1756	30.9702	2.08883	5.45674	32.4679	6.735	5.19986	1.71313
GhNPF8.4	Ghir_A04G013880	2.32879	2.74389	6.53161	2.48537	3.49887	6.63721	6.19056	5.06141	8.26743	2.80718	3.41326	6.85041	3.73262	2.61521	2.17199
GhNPF8.5	Ghir_A08G000650	0	0	0	0	0	0	0	0	0	0	0	0	0.107691	0.07171	0
GhNPF8.6	Ghir_A09G017230	0.36529	0.203097	0.228341	0.163181	0.114487	0.27711	0.756947	0.152512	0.435091	0.321714	0.210948	0.161723	0.572507	1.2991	0.18207
GhNPF8.7	Ghir_D03G013080	1.72384	4.80147	6.65364	1.65007	5.87585	11.3343	9.08171	10.5785	18.0228	4.16708	5.48384	14.772	5.38996	4.69963	1.88064
GhNPF8.8	Ghir_D05G009250	0.0433054	0.140543	0.106426	0.0773804	0.399973	1.07158	0.201325	0.94894	1.32116	0.0762788	0.334018	0.769674	0.312326	0.190415	0.345353
GhNPF8.9	Ghir_D04G018340	3.69266	4.23046	6.04715	3.36119	5.11503	7.29164	6.7635	7.13182	10.0865	4.12114	4.62871	8.34081	3.40968	2.66892	3.19173
GhNPF8.10	Ghir_D08G000650	0	0	0	0	0	0	0	0	0	0	0	0	0	0	0
GhNPF8.11	Ghir_D09G016670	1.1872	1.5368	2.08185	1.26465	2.13773	2.87235	3.37782	3.15421	3.45534	1.31516	1.92299	2.7445	2.80962	2.06584	1.60586
GhNPF8.12	Ghir_A01G013690	9.60013	9.67009	15.1099	8.69064	13.1381	22.2094	11.0996	10.4864	14.9225	10.2753	12.4231	16.8122	10.8831	7.04076	7.95281
GhNPF8.13	Ghir_D01G014960	5.87202	8.87125	19.0275	4.98006	11.3084	25.7715	6.48607	13.7489	24.7325	4.94252	11.2937	26.6672	8.05154	6.168	7.82733
