# Supplementary material for: Identification and Expression Analysis of the NPF Genes in Cotton
Source: Int J Mol Sci. 2022 Nov 17;23(22):14262. doi: 10.3390/ijms232214262 (PMC9692789; doi:10.3390/ijms232214262)
Supplement: Supplementary file 1 [file ijms-23-14262-s001.zip › Supplement Table S6.xlsx]

## Sheet: Table S6
Table S6.Expression profiles of GhNPF family genes under N deficiency treatments. Asterisks marked 54 GhNPF genes is selected for Fig.5.
Gene name	Gene ID	LN_Root	HN_Root	LN_Shoot	HN_Shoot
GhNPF1.1	Ghir_A08G026350	0.0414757	0.0995357	1.37781	2.6352
GhNPF1.2	Ghir_D08G027180	1.91658	2.2715	0.488395	0.703874
GhNPF1.3	Ghir_D08G027190	0.866029	0.870285	2.1999	2.02212
GhNPF1.4	Ghir_A02G013370	0.0589267	0.181955	0.877673	0.788756
GhNPF1.5	Ghir_A05G013420	8.38833	12.8048	13.2559	5.26989
GhNPF1.6	Ghir_A05G025170	0	0	0	0
GhNPF1.7	Ghir_A08G026340	4.44708	5.05718	1.95162	2.95681
GhNPF1.8	Ghir_A09G002220	14.1885	10.2247	8.80541	13.9534
GhNPF1.9	Ghir_D03G007520	0	0	0.008226	0.007101
GhNPF1.10	Ghir_D05G013190	12.0639	14.8292	19.7251	16.0334
GhNPF1.11	Ghir_D05G025340	0.013374	0	0.0127183	0.0521453
GhNPF1.12	Ghir_D09G002130	0.984064	0.225507	1.04269	0.915459
GhNPF2.1	Ghir_A08G001240	0.242136	0.0737107	0.827408	0.634167
GhNPF2.2	Ghir_D08G001250	0	0	0.136969	0.130375
GhNPF2.3	Ghir_A05G010300	3.25942	2.66231	0.113893	0.151876
GhNPF2.4	Ghir_A05G010310	0.292563	0.278137	0.226116	0.376153
GhNPF2.5	Ghir_A07G012310	0.310151	0.043665	2.69736	1.63578
GhNPF2.6	Ghir_D05G010020	4.68852	4.89752	0.60736	0.5331
GhNPF2.7	Ghir_D05G010030	0.200791	0.240436	1.67594	1.77943
GhNPF2.8	Ghir_D07G012460	0.156516	0.17014	0.678355	0.421046
GhNPF2.9	Ghir_A01G021420	0	0.0144663	0.030233	0
GhNPF2.10	Ghir_D01G022950	0.150721	0.0676803	0.092908	0.0486007
GhNPF2.11	Ghir_A03G007560	5.19325	2.92395	0.388594	2.07667
GhNPF2.12	Ghir_A12G018490	1.96596	1.63696	29.24	46.2348
GhNPF2.13	Ghir_D03G010070	8.70142	6.80023	0.345228	1.31391
GhNPF2.14	Ghir_D12G018790	3.78193	2.22839	16.0363	18.6766
GhNPF2.15	Ghir_A04G010560	0.809146	1.5114	4.95692	4.76111
GhNPF2.16	Ghir_D04G014790	3.97917	3.07552	15.1201	16.4307
GhNPF2.17	Ghir_D12G005150	0.00831567	0.0254503	0	0
GhNPF2.18	Ghir_A05G033530	0	0	0	0
GhNPF2.19	Ghir_A12G005200	0.00827333	0	0	0.00950567
GhNPF2.20	Ghir_D05G033330	0.0648453	0.00898333	0.018119	0
GhNPF3.1	Ghir_A03G011360	5.77284	3.50259	1.86885	4.97338
GhNPF3.2	Ghir_A03G011400	0.0884503	0.0471703	1.83752	3.78157
GhNPF3.3	Ghir_A10G013540	0.0959087	0.0386637	0.00659867	0.231446
GhNPF3.4	Ghir_A13G005380	5.40721	3.82401	38.8632	46.3859
GhNPF3.5	Ghir_D02G011850	11.0392	7.03774	6.18577	5.19444
GhNPF3.6	Ghir_D02G011870	0	0	0	0
GhNPF3.7	Ghir_D10G014050	0.441578	0.311585	0.114689	0.158082
GhNPF3.8	Ghir_D13G007010	2.0344	1.42141	37.2254	32.3216
GhNPF4.1	Ghir_A07G021310	3.82792	3.20545	0.007342	0.01563
GhNPF4.2	Ghir_D07G021480	1.77601	1.23445	0.141693	0.185854
GhNPF4.3	Ghir_A05G007500	0.0783163	0.259609	0	0
GhNPF4.4	Ghir_A06G015610	1.30613	1.67727	1.15035	0.551012
GhNPF4.5	Ghir_A10G016170	9.75175	12.687	4.91785	4.38415
GhNPF4.6	Ghir_A11G029930	0.023185	0.0224307	0.10528	0.0310643
GhNPF4.7	Ghir_D05G007570	0	0	0	0
GhNPF4.8	Ghir_D06G015250	149.988	23.8069	0.0310623	0.00740467
GhNPF4.9	Ghir_D06G016370	0.217273	0.34895	0.222294	0.0638
GhNPF4.10	Ghir_D10G008840	8.8727	12.091	3.06928	2.06534
GhNPF4.11	Ghir_D11G030070	0.0581937	0.023163	0.0647033	0.0173637
GhNPF4.12	Ghir_A08G024100	1.05117	2.20644	0.649692	0.417238
GhNPF4.13	Ghir_D08G025010	4.98765	10.0732	7.78983	4.75962
GhNPF4.14	Ghir_A03G011410	0.811194	0.711934	0.983164	0.369952
GhNPF4.15	Ghir_A05G020400	1.63094	2.01505	0	0.0319527
GhNPF4.16	Ghir_A05G020410	0.749086	0.486738	3.15271	2.09136
GhNPF4.17	Ghir_A06G013460	19.9319	0.90646	0.0127187	0.00593933
GhNPF4.18	Ghir_A12G017790	1.61524	1.12082	8.73195	8.77328
GhNPF4.19	Ghir_A12G018540	0	0	0.161449	0.180661
GhNPF4.20	Ghir_A13G005080	2.41639	1.50065	0.566282	0.217133
GhNPF4.21	Ghir_D02G011830	0.521569	0.457085	6.42436	2.86111
GhNPF4.22	Ghir_D05G020360	0.535834	1.07817	0	0
GhNPF4.23	Ghir_D05G020370	0.857251	0.593859	2.05189	3.17356
GhNPF4.24	Ghir_D12G018040	2.22756	3.45225	7.78658	7.2041
GhNPF4.25	Ghir_D12G018820	0.331379	0.730989	1.35184	0.612414
GhNPF4.26	Ghir_D13G007110	1.44029	1.32775	0.3705	0.15064
GhNPF4.27	Ghir_A03G017020	0.193177	0.116194	13.2649	12.0954
GhNPF4.28	Ghir_D02G018280	0.479606	0.143919	24.0311	19.7348
GhNPF4.29	Ghir_A05G026150	0.0241667	0.00998	0	0.019054
GhNPF4.30	Ghir_D05G026170	1.91711	1.73138	1.48891	1.18209
GhNPF5.1	Ghir_A06G019250	1.61968	1.6255	14.3137	7.58288
GhNPF5.2	Ghir_A10G018590	1.39305	0.922175	4.42744	4.87986
GhNPF5.3	Ghir_D06G020380	6.65204	8.11101	10.1098	7.56977
GhNPF5.4	Ghir_D10G020110	3.95406	2.1901	9.22474	11.4781
GhNPF5.5	Ghir_A02G004240	13.5338	10.9413	3.30897	6.01309
GhNPF5.6	Ghir_A07G016100	0.502992	0.648835	0.119948	0.151474
GhNPF5.7	Ghir_A07G022140	5.98775	0.549847	0.352449	0.700983
GhNPF5.8	Ghir_D02G004590	22.3876	10.7645	0.92193	1.25235
GhNPF5.9	Ghir_D07G016410	0.036369	0	0.0141053	0
GhNPF5.10	Ghir_D07G022230	0.152913	0.0192963	0.0981637	0.22443
GhNPF5.11	Ghir_A05G024920	0.035122	0.0825387	0.0173903	0.0402913
GhNPF5.12	Ghir_A05G041290	0.452856	0.310914	0.990834	0.333987
GhNPF5.13	Ghir_A10G019000	0.235823	0.116157	0.0635647	0.111368
GhNPF5.14	Ghir_A12G017060	0.0701237	0.071694	0	0.0227007
GhNPF5.15	Ghir_D04G001680	0.920511	2.40039	0.468075	0.272962
GhNPF5.16	Ghir_D05G024960	0	0	0	0
GhNPF5.17	Ghir_D10G020570	0.189701	0.48609	0.311895	0.263954
GhNPF5.18	Ghir_D12G017300	0.0598107	0.058087	0.00686433	0.00762033
GhNPF5.19	Ghir_A12G017050	0.373854	0.129362	0.791591	5.37469
GhNPF5.20	Ghir_D12G017290	2.65449	1.9929	2.88737	4.41824
GhNPF5.21	Ghir_A09G011550	0.0169907	0.047332	0.0116967	0.0676743
GhNPF5.22	Ghir_A09G011560	0	0	0	0
GhNPF5.23	Ghir_A09G016150	19.5933	13.7581	11.7555	9.90254
GhNPF5.24	Ghir_D09G011090	0.0394247	0.0738037	0.12232	0.133836
GhNPF5.25	Ghir_D09G015600	5.45699	9.89426	4.85711	2.85524
GhNPF5.26	Ghir_A05G037450	4.76781	4.74411	1.77128	2.40752
GhNPF5.27	Ghir_A09G002600	2.21904	2.59877	11.3164	7.0036
GhNPF5.28	Ghir_D04G005570	4.68403	4.15763	0.486097	0.0848047
GhNPF5.29	Ghir_D09G002550	2.94181	2.38138	6.58829	4.95012
GhNPF5.30	Ghir_A02G009900	2.62773	2.23196	2.86171	2.58083
GhNPF5.31	Ghir_A05G027860	5.49597	7.32528	4.57888	4.50746
GhNPF5.32	Ghir_A13G012570	4.04433	3.58624	0	0.0131613
GhNPF5.33	Ghir_D02G010420	7.50162	7.3719	11.3755	11.2635
GhNPF5.34	Ghir_D05G027900	0	0	0.007108	0.0298327
GhNPF5.35	Ghir_D13G013140	7.69518	6.86587	0.460427	0.603062
GhNPF6.1	Ghir_A11G016270	0.220551	0.302068	3.00518	2.32567
GhNPF6.2	Ghir_D11G016340	0.0113503	0.032059	4.58885	3.08227
GhNPF6.3	Ghir_A06G005900	0.646747	1.99186	0.662399	0.00756633
GhNPF6.4	Ghir_A07G004050	0.937754	1.15559	39.2506	24.5408
GhNPF6.5	Ghir_A13G019570	29.235	37.7704	94.7772	53.9377
GhNPF6.6	Ghir_D06G005950	0	0.0106173	0	0
GhNPF6.7	Ghir_D06G005980	20.6205	7.1081	48.7119	15.3975
GhNPF6.8	Ghir_D07G004100	0.168024	0.419031	17.9484	14.162
GhNPF6.9	Ghir_D13G020310	7.79762	7.51771	36.2796	23.3587
GhNPF6.10	Ghir_A03G001460	13.655	39.6842	0.0144817	0
GhNPF6.11	Ghir_A03G001470	0	0	0	0
GhNPF6.12	Ghir_A03G001480	20.5301	18.9759	6.64428	15.0555
GhNPF6.13	Ghir_A08G017860	0.182731	0.137752	39.4609	64.9482
GhNPF6.14	Ghir_A12G023240	0.628686	52.8134	1.64459	1.76985
GhNPF6.15	Ghir_D03G017590	10.4928	14.0973	8.33137	15.5023
GhNPF6.16	Ghir_D03G017600	3.82909	8.17276	0.098408	0.0972093
GhNPF6.17	Ghir_D08G018760	0.325799	0.13271	31.9785	40.4538
GhNPF6.18	Ghir_A07G017680	72.4539	29.0951	99.4445	105.8
GhNPF6.19	Ghir_D07G018430	33.6145	13.016	100.513	88.0729
GhNPF7.1	Ghir_A06G012350	16.0242	4.7071	20.7917	19.6624
GhNPF7.2	Ghir_A13G022680	0.012586	0	1.10479	0.878078
GhNPF7.3	Ghir_D06G012150	0	0	0	0
GhNPF7.4	Ghir_D13G023340	0.00826967	0	0.269625	0.0822963
GhNPF7.5	Ghir_A03G000790	0.570106	33.6826	0.433136	0.199293
GhNPF7.6	Ghir_A06G016960	0.100316	0.0353163	2.78668	3.68733
GhNPF7.7	Ghir_A08G014360	0.017523	0	0.107159	0.02743
GhNPF7.8	Ghir_A08G016730	27.3524	105.721	44.248	25.536
GhNPF7.9	Ghir_A13G001050	5.16089	7.70034	9.49803	12.4294
GhNPF7.10	Ghir_D03G018390	1.09659	44.7264	0.363487	0.220546
GhNPF7.11	Ghir_D06G017930	0.0490347	0.0526707	4.06369	4.40601
GhNPF7.12	Ghir_D08G015240	0	0	0.0150807	0
GhNPF7.13	Ghir_D08G017550	28.4964	103.897	28.2333	20.2834
GhNPF8.1	Ghir_A01G021940	0	0	0	0
GhNPF8.2	Ghir_A03G005790	10.6851	7.52149	4.25462	5.33593
GhNPF8.3	Ghir_A05G009240	2.70351	0.317017	8.16389	16.5996
GhNPF8.4	Ghir_A04G013880	9.20283	7.4663	4.27646	4.62257
GhNPF8.5	Ghir_A08G000650	14.7535	3.62722	0.0134997	0.0149343
GhNPF8.6	Ghir_A09G017230	6.11481	7.41144	2.41631	1.9259
GhNPF8.7	Ghir_D03G013080	12.6866	10.3123	3.87859	5.31958
GhNPF8.8	Ghir_D05G009250	0.56735	0.0743173	0.579369	2.46823
GhNPF8.9	Ghir_D04G018340	5.03877	5.28156	3.49568	3.24551
GhNPF8.10	Ghir_D08G000650	11.5979	3.16078	0.166669	0.00757033
GhNPF8.11	Ghir_D09G016670	3.5409	2.24502	4.08703	2.2414
GhNPF8.12	Ghir_A01G013690	8.63485	8.61646	6.25731	7.46144
GhNPF8.13	Ghir_D01G014960	15.3767	13.8608	9.38918	13.4094
